# Supplementary material
Source: PubMed Central journal article supplement (PMC3755547)
Supplement: 313738_1_En_221_MOESM3_ESM.pdf [file 313738_1_En_221_MOESM3_ESM.pdf]

# A reduced cerebral metabolic ratio in exercise reflects metabolism and not accumulation of lactate within the human brain

Mads K. Dalsgaard<sup>1</sup>, Bjørn Quistorff<sup>2</sup>, Else R. Danielsen<sup>3</sup>, Christian Selmer<sup>1</sup>, Thomas Vogelsang<sup>1</sup> and Niels H. Secher<sup>1</sup>

Departments of <sup>1</sup>Anaesthesia and <sup>3</sup>Radiology, The Copenhagen Muscle Research Centre, Rigshospitalet

<sup>2</sup>Department of Medical Biochemistry and Genetics, The Panum Institute, University of Copenhagen, Denmark

During maximal exercise lactate taken up by the human brain contributes to reduce the cerebral metabolic ratio,  $O_2/(\text{glucose} + 1/2 \text{ lactate})$ , but it is not known whether the lactate is metabolized or if it accumulates in a distribution volume. In one experiment the cerebral arterio-venous differences (AV) for  $O_2$ , glucose (glc) and lactate (lac) were evaluated in nine healthy subjects at rest and during and after exercise to exhaustion. The cerebrospinal fluid (CSF) was drained through a lumbar puncture immediately after exercise, while control values were obtained from six other healthy young subjects. In a second experiment magnetic resonance spectroscopy (<sup>1</sup>H-MRS) was performed after exhaustive exercise to assess lactate levels in the brain ( $n = 5$ ). Exercise increased the  $AV_{O_2}$  from  $3.2 \pm 0.1$  at rest to  $3.5 \pm 0.2$  mM (mean  $\pm$  S.E.M.;  $P < 0.05$ ) and the  $AV_{\text{glc}}$  from  $0.6 \pm 0.0$  to  $0.9 \pm 0.1$  mM ( $P < 0.01$ ). Notably, the  $AV_{\text{lac}}$  increased from  $0.0 \pm 0.0$  to  $1.3 \pm 0.2$  mM at the point of exhaustion ( $P < 0.01$ ). Thus, maximal exercise reduced the cerebral metabolic ratio from  $6.0 \pm 0.3$  to  $2.8 \pm 0.2$  ( $P < 0.05$ ) and it remained low during the early recovery. Despite this, the CSF concentration of lactate postexercise ( $1.2 \pm 0.1$  mM;  $n = 7$ ) was not different from baseline ( $1.4 \pm 0.1$  mM;  $n = 6$ ). Also, the <sup>1</sup>H-MRS signal from lactate obtained after exercise was smaller than the estimated detection limit of  $\sim 1.5$  mM. The finding that an increase in lactate could not be detected in the CSF or within the brain rules out accumulation in a distribution volume and indicates that the lactate taken up by the brain is metabolized.

(Resubmitted 11 September 2003; accepted after revision 3 November 2003; first published online 7 November 2003)

**Corresponding author** M. Dalsgaard: Department of Anaesthesia, Rigshospitalet 2041, Blegdamsvej 9, DK-2100 Copenhagen Ø, Denmark. Email: madskda@tiscali.dk

In contrast to organs such as the heart, the liver and the kidney, the brain is normally entirely dependent upon glucose as an energy substrate as implied by an oxygen/glucose ratio close to 6.0 (Ahlborg & Wahren, 1972; Madsen *et al.* 1995*b*). However, substrates other than glucose can serve as an energy source under conditions of increased availability and/or when glucose utilization is hampered. Ketone bodies become important for brain metabolism during a 3 day fast where the concentration in the blood increases to 3–5 mM (Hasselbalch *et al.* 1994) and also during heart surgery (Sandström *et al.* 1999). Lactate appears to be a substrate for the brain as reflected by an increased cerebral uptake during cardiopulmonary resuscitation (Rivers *et al.* 1991), with acute hypoglycaemia in insulin-dependent diabetes mellitus (Avogaro *et al.* 1990), and in healthy hypoglycaemic subjects (Veneman *et al.* 1994). Equally, during maximal exercise the human

brain seems to profit from the lactate produced by skeletal muscles, thereby causing a reduction of the cerebral metabolic ratio ( $O_2/(\text{glucose} + 1/2 \text{ lactate})$ ) by 30–40% (Ide *et al.* 2000; Dalsgaard *et al.* 2002). Cell cultures of brain tissue metabolize lactate (Schurr *et al.* 1988; Larrabee, 1996) and lactate appears to act as an intercellular shuttle of energy within the brain (Magistretti & Pellerin, 1997; Brown *et al.* 2003). The potential of lactate to serve as substrate for the human brain is indicated when infusion of lactate abolishes hypoglycaemic symptoms (Veneman *et al.* 1994; King *et al.* 1998) and reduces the cerebral consumption of glucose during euglycaemia (Smith *et al.* 2003).

Following exhaustive exercise, the large additional uptake of lactate and glucose relative to oxygen, as expressed in a decreasing cerebral metabolic ratio, indicates that glucose and lactate are either stored or

metabolized since they are not released from the brain during a 1 h recovery period (Ide *et al.* 2000; Dalsgaard *et al.* 2002). Accumulation of lactate in its distribution volume for the brain would be expected to be communicated to the cerebrospinal fluid (CSF) while at the same time transport of substrates from blood to CSF is restricted (Plum & Posner, 1967; Nilsson *et al.* 1992). Building up of lactate in the brain would also be expected to be visible by magnetic resonance spectroscopy ( $^1\text{H-MRS}$ ; Dager *et al.* 1992). In two experiments this study demonstrated that, following exhaustive exercise, lactate does not accumulate in the CSF (Experiment I) or within the brain as determined by  $^1\text{H-MRS}$  (Experiment II).

## Methods

The study was approved by the Ethics Committee of Copenhagen (KF 01-034/02) and conformed to the standards set by the Declaration of Helsinki.

### Experiment I. AV-differences over the brain and cerebrospinal fluid

Nine healthy subjects were studied after giving written informed consent (mean  $\pm$  s.e.m.; 2 females and 7 males; age  $25 \pm 1$  years; height  $182 \pm 3$  cm; weight,  $80 \pm 2$  kg).

Aiming to increase the arterial lactate level markedly, we used a cycle ergometer that allowed for simultaneous arm cranking. A pace of 60 revolutions per minute for both the arms and the legs was dictated by a metronome. The participants attended the laboratory twice. A minimum of 3 days prior to the main study, their work capacity was determined by incremental exercise for the arms ( $149 \pm 12$  W) and the legs ( $306 \pm 16$  W) separately, and the subjects were familiarized with combined arm and leg exercise.

On the morning of the main study the participants had been fasting for 8 h, although intake of water was permitted. Catheterization and a subsequent resting period were followed by combined arm and leg exercise until exhaustion. The work rate was increased  $\sim 10\%$  every 2 min from a warm up level  $\sim 30\%$  of the individually determined maximal capacity. As soon as possible, i.e. 2–3 min after termination of exercise when the blood lactate was still above 13 mM, CSF was drained through a lumbar puncture.

Arterio-venous differences over the brain (AV) were determined by means of a retrograde catheter (14 gauge; 2.2 mm) in the right internal jugular vein with the tip positioned below the basis of the skull and another catheter (20 gauge; 1.1 mm) in the radial artery of the non-dominant arm. The catheters were reported to neither

inflict pain nor hamper the ability to exercise. Blood samples were drawn three times at rest, every 2 min during exercise and during the recovery at minutes 1, 2, 3, 5, 7, 10, 15, 20 and 30. Pre-heparinized syringes (Radiometer, Copenhagen, Denmark) were rotated for about 3 min and subsequently kept in ice water until analysis for lactate, glucose and blood gas variables (ABL 725, Radiometer).

To obtain CSF postexercise and following local anaesthesia (2% lidocaine), a 25 gauge pencil-point cannula (Braun, Melsungen, Germany) was advanced between the third and fourth lumbar vertebrae to the subdural space. Aiming to minimize the risk of spinal headache, isotonic saline (1 l) was administered intravenously during the first hour of the recovery. The procedure was well tolerated and did not cause headache or other adverse effects. The CSF concentration of lactate was determined (ABL 725). To avoid multiple lumbar punctures, resting values were determined similarly from six other healthy subjects (3 females and 3 males, age  $25 \pm 1$  years, height  $179 \pm 2$  cm, weight  $73 \pm 3$  kg) and the average of three measurements is reported (YSI, Yellow Springs, OH, USA).

Mean arterial pressure (MAP) was measured through a transducer (Bentley, Uden, The Netherlands) connected to a patient monitor (Dialogue 2000, Danica Electronic, Copenhagen, Denmark). Subjects expressed their perceived exertion (RPE) on a scale ranging from rest, '6', to the hardest imaginable exercise, '20' (Borg, 1970).

Values are presented as means  $\pm$  s.e.m. Changes with time were detected by Friedman's test and located using Wilcoxon's signed test by rank. The CSF lactate was compared using the Mann–Whitney test. A  $P$ -value  $< 0.05$  was considered significant.

### Experiment II. Magnetic resonance spectroscopy

The  $^1\text{H-MRS}$  of the brain was performed on another five volunteers before, during and after exhaustive exercise to determine the cerebral lactate concentration. In order to estimate the detection limit for lactate, seven basketballs (15 cm diameter) were measured containing buffered (pH 7) solutions of 100 mM NaCl, 50 mM phosphate, 5 mM  $\text{NaN}_3$ , 10 mM creatine, and varying concentrations of sodium lactate (Fig. 1). Each ball was replaced and measured five times by sampling of 20 averages using the same acquisition parameters and the same sized volume of interest (VOI) as *in vivo*. From these experiments the detection limit was estimated conservatively as 0.75 mM. The *in vivo* detection limit for lactate was assessed individually. The concentration of total creatine *in vivo* was assumed to remain stable and therefore the reduction

in percentage from baseline was used to estimate the signal loss due to respiratory movement. If the creatine concentration, say, was halved postexercise the detection limit was set twice as high (1.5 mM). In most of the volunteers the spectral resolution was maintained postexercise and their detection limits for lactate became 1.5 mM or less. In one subject, however, the spectral resolution dropped postexercise (the full width at half maximum, FWHM, increased from 0.052 to 0.109 p.p.m.). Therefore, the 1.0 and 2.0 mM lactate phantoms were measured in deliberately misadjusted magnetic fields, deteriorating resolution to the same extent as *in vivo*

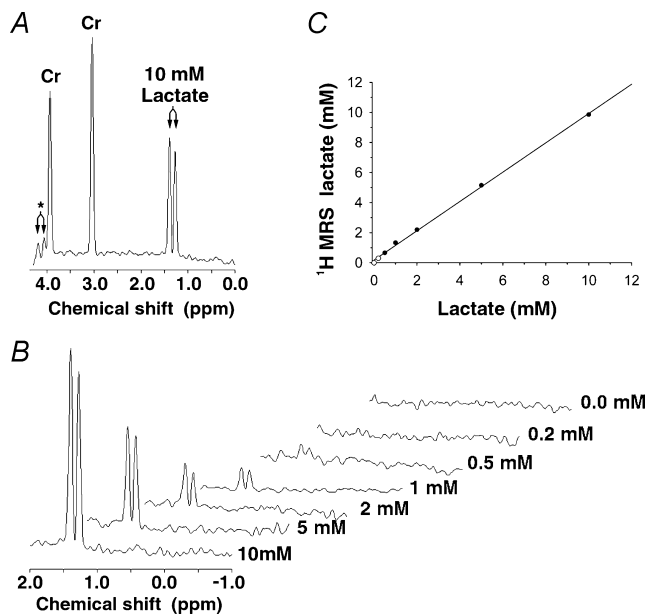

**Figure 1. Magnetic Resonance Spectroscopy from phantoms (basketballs) with varying lactate concentration for estimation of the detection limit for lactate (Experiment II)**

A, spectrum from the phantom containing 10 mM lactate and 10 mM creatine (Cr) in physiological saline. The lactate resonates at 1.33 and 4.11 p.p.m. (where only the two centre peak are seen, \*). B, the 1.0–2.0 p.p.m. regions of the spectra from the phantoms containing 0–10 mM lactate, demonstrating that the detection limit for lactate in this set-up is between 0.5 and 1.0 mM, matching the limit found by the Cramér-Rao lower bounds (CRLB) > 20%. Recording conditions *in vitro* and *in vivo* were identical. C, the correlation between the true and the measured lactate concentration in the phantoms is fitted by  $y = 0.9755x + 0.1797$ ,  $r^2 = 0.9988$ . A distinction is made between reliable (●) (above the detection limit) and unreliable lactate concentrations (○); see below. Data are means of five measurements with s.e.m. too small to be visible on the graph. The CRLB was calculated by the LCMoel quantification program and is the estimated standard deviation expressed as a percentage of the estimated concentration. In all five measurements of the 0.2 mM phantom, CRLB was > 31%. Even though for this phantom the LCMoel estimated the lactate concentration consistently to an average of 0.29 mM, the large CRLB (> 20%) by definition renders the detection of lactate at this level unreliable.

(FWHM, 0.092 and 0.114 p.p.m.; 1.0 and 2.0 mM phantoms, respectively). Based on these measurements the detection limit for lactate became 2.0 mM for this volunteer.

Exercise was performed either in-magnet, applying a four limb non-magnetic ergometer designed for the study ( $n = 2$ ) or on a rowing ergometer ( $n = 3$ ) with the volunteer being transferred to the magnet where the measurements started less than 40 s after exercise when plasma lactate reaches its highest level (Nielsen *et al.* 2002). All subjects had a casting of their head made in order to ensure a fixed and stable position in the coil. The VOI (40 ml; 40 mm × 40 mm × 25 mm) was placed in the supra-ventricular cortex. Spectra were acquired using stimulated echo acquisition mode, repetition time = 3000 ms and echo time = 20 ms using a 1.5 Tesla vision magnet (Siemens, Erlangen, Germany). A spectrum at rest was sampled (86 averages). The individual acquisitions sampled during and after exercise were stored separately or in blocks of 20 averages. Effects of residual movement were handled by phasing the individual set of data before averaging. The resolution was typically 0.08 p.p.m.

Spectra were processed for graphical display using the scanner's software applying eddy current correction, zero filling, filtering (Gaussian 512 ms), and filtering of the residual water signal. Quantification of the data used the fully automated LCMoel (Provencher, 1993) and the principle of reciprocity (Michaelis *et al.* 1993). Absence or presence of lactate was determined using the Cramér-Rao lower bound (CRLB) as calculated by the LCMoel quantification program. The CRLB is the estimated standard deviation expressed as a percentage of the estimated concentration. For a CRLB less than 20%, detection and quantification of lactate were considered reliable.

## Results

### Experiment I

Exercise increased MAP from  $89 \pm 3$  at rest to  $112 \pm 4$  mmHg ( $P < 0.05$ ). Exhaustion was on average reached after  $12 \pm 1$  min and all subjects reported RPE to be '20'. Also, the arterial and venous content of O<sub>2</sub>, glucose and lactate all increased compared to rest with lactate reaching  $14.5 \pm 0.9$  mM in the immediate recovery (Fig. 2).

The individual values of AV<sub>O<sub>2</sub></sub> did not change significantly with exercise, but when averaged the AV<sub>O<sub>2</sub></sub> increased from  $3.2 \pm 0.1$  at rest to  $3.5 \pm 0.2$  mM during the most strenuous part of exercise, and it stayed elevated during the recovery (Fig. 3). The AV<sub>glc</sub> increased from  $0.6 \pm 0.0$  to  $0.9 \pm 0.1$  mM and reached a maximum of

$1.3 \pm 0.3$  mM immediately after exercise and then returned to baseline within 10 min. In comparison, the  $AV_{lac}$  rose faster (from zero) during exercise with the peak value of  $1.3 \pm 0.2$  mM surpassing the simultaneous value for  $AV_{glc}$ . Thus, exercise reduced the  $O_2$ /glucose ratio from  $5.7 \pm 0.3$  to a nadir of  $3.6 \pm 0.5$  in the first minute of recovery, but it then increased to above the resting level ( $7.5 \pm 0.5$ ;  $P < 0.05$ ) after 20 min (Fig. 4). When taking into account the cerebral lactate uptake, the ratio of  $O_2$ /(glucose + 1/2 lactate) decreased from  $6.0 \pm 0.3$  at rest to  $2.8 \pm 0.2$  at the point of exhaustion and it remained low (at  $2.7 \pm 0.5$ ) for the first 2–3 min whereafter it gradually approached baseline towards the end of the recovery period. In these subjects following exhaustive exercise, the CSF lactate concentration corresponded to that obtained at rest ( $1.2 \pm 0.1$  versus  $1.4 \pm 0.1$  mM).

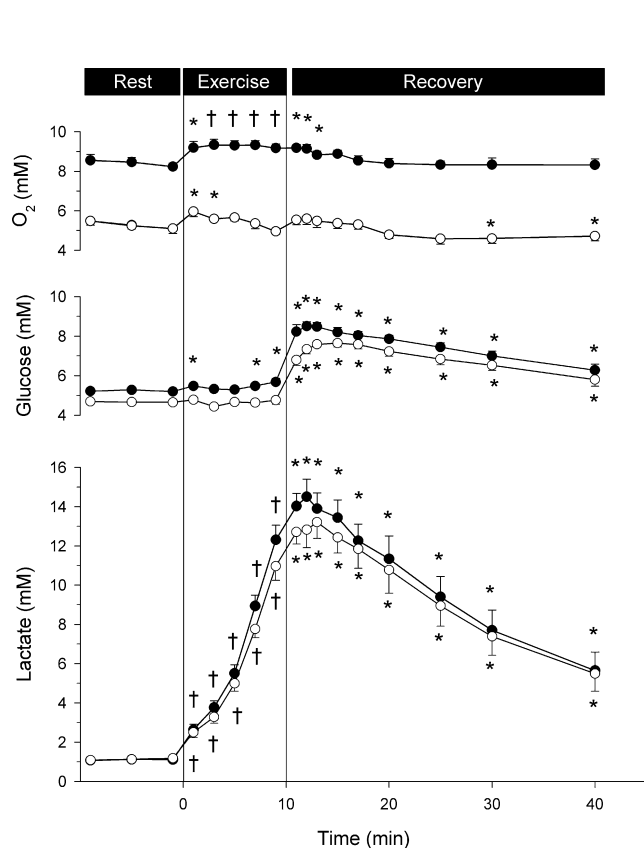

**Figure 2. Arterial (●) and internal jugular venous (○) concentrations at rest, in response to exhaustive arm and leg exercise and in the recovery (Experiment I)**

The time to exhaustion differed and in order to compare between the subjects the exercise data were fitted to 10 min with 5 data points ( $n = 9$ ); recovery ( $n = 8$ ). Values represent means  $\pm$  S.E.M. Different from rest: \* $P < 0.05$ ; † $P < 0.01$ .

## Experiment II

In response to exercise peak blood lactate was  $6.7 \pm 0.7$  and  $13.4 \pm 1.3$  mM for in- and out-magnet exercise, respectively. The  $^1H$ -MRS spectra were obtained at rest and during the interval from 0.5 to 5.0 min postexercise, which coincides with a high cerebral lactate uptake, the lowest cerebral metabolic ratio, and the time of the lumbar puncture in Experiment I. There was no significant difference in the cerebral lactate concentration between exercise and rest in these spectra (Fig. 5).

## Discussion

At rest the concentration of lactate in CSF was identical to reported values (Yao *et al.* 1987) and to the concentration in the extracellular fluid of the brain in conscious patients (Abi-Saab *et al.* 2002). A CSF lactate that is slightly

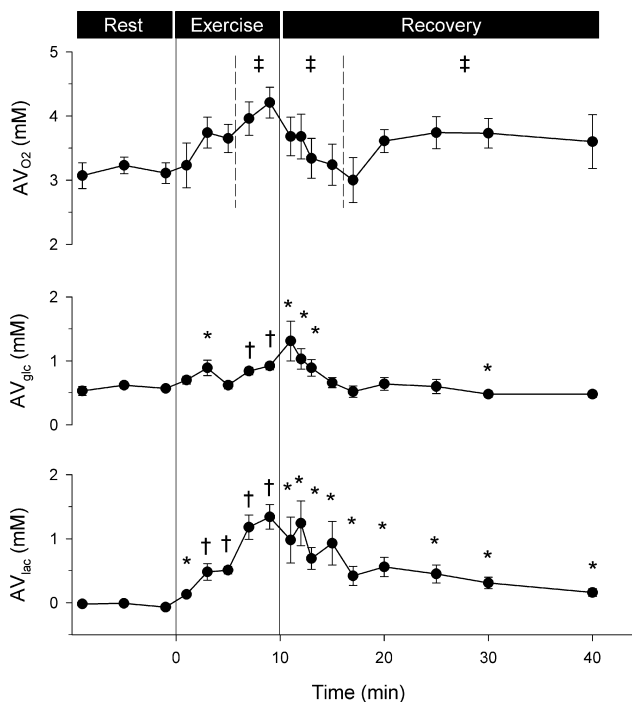

**Figure 3. Arterio-venous differences over the brain at rest and during exhaustive arm and leg exercise and in the recovery (Experiment I)**

Data from exercise are fitted to 10 min as in Fig. 2 ( $n = 9$ ; recovery,  $n = 8$ ). Values represent means  $\pm$  S.E.M. Different from rest: \* $P < 0.05$ ; † $P < 0.01$ . For statistical analysis of  $AV_{O_2}$ , data were grouped into 5 time periods and the average for each period calculated. The groups are as follows: rest, exercise at a 'low' intensity (first 6 min), exercise at a 'high' intensity (last 4 min), the first 5 min, and the remainder of the recovery (Ide *et al.* 2000). Division of the exercise period and the recovery interval is denoted by dashed lines. Group averages different from rest: ‡ $P < 0.05$ .

higher than the concomitant arterial level is consistent with ongoing cerebral glycolysis, supported by a cerebral ratio of  $O_2$ /glucose of  $\sim 5.7$  and a discrete lactate efflux from the brain ( $AV_{lac}$  with two decimals  $-0.03 \pm 0.01$ ) confirming previous reports (Avogaro *et al.* 1990; Madsen *et al.* 1995b; Sandström *et al.* 1999; Dalsgaard *et al.* 2002, 2003; Nybo *et al.* 2003). In response to exhaustive exercise, the brain took up lactate in molar amounts similar to that of glucose. Integrating the  $AV_{lac}$  curve during exercise and for the first 5 min of the recovery in Experiment I, and assuming a global CBF of  $0.7 \text{ l min}^{-1}$  (Nybo *et al.* 2002), the lactate uptake was  $\sim 8 \text{ mmol}$  (the mean lactate uptake in the two subjects in Experiment II who exercised inside the magnet would be  $\sim 4 \text{ mmol}$  if  $AV_{lac}$  is assumed to be proportional to the blood concentration). Taking the estimated distribution volume for lactate in the CNS to be of a size comparable to that of glucose in the rat ( $\sim 0.77 \text{ ml g}^{-1}$ ; Choi *et al.* 2001), the resulting concentration would be  $\sim 8 \text{ mM}$ . Such a high concentration of lactate in the brain would be expected to increase the CSF lactate concentration (Plum & Posner, 1967; Nilsson *et al.* 1992) but no increase was observed. Also, it is reasonable to assume that the subjects in Experiment II had an equivalent cerebral lactate uptake, with the potential of increasing lactate concentration within the brain at least 4-fold (2-fold for two subjects) the estimated detection limit of the

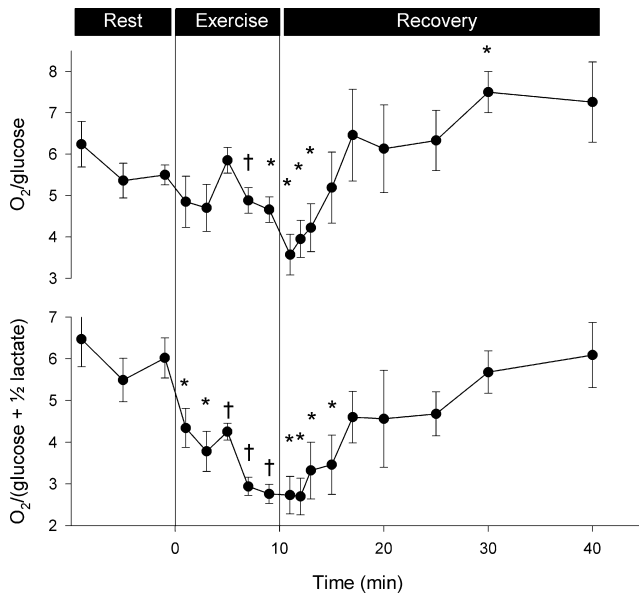

**Figure 4. The cerebral metabolic ratios of  $O_2$ /glucose and  $O_2/(\text{glucose} + \frac{1}{2} \text{lactate})$  at rest and during exhaustive arm and leg exercise and in the recovery (Experiment I)**

Data from exercise are fitted to 10 min as in Figs 2 and 3 ( $n = 9$ ; recovery,  $n = 8$ ). Values represent means  $\pm$  S.E.M. Different from rest: \* $P < 0.05$ ; † $P < 0.01$ .

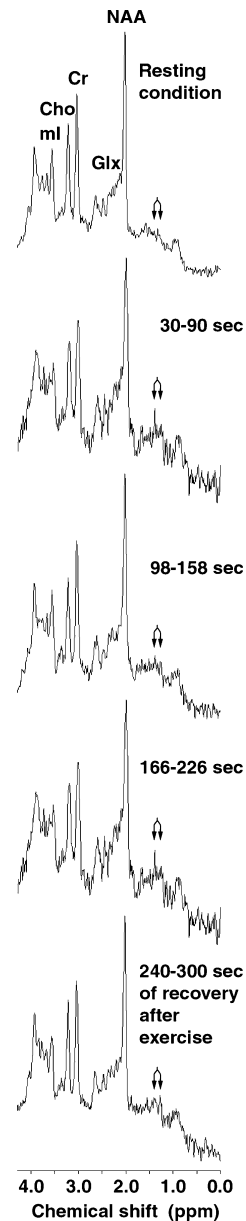

**Figure 5. Magnetic Resonance Spectroscopy pre- and postexercise (30 s to 5 min) in a volunteer exercising to exhaustion outside the magnet (Experiment II)**

Each of the spectra represents 1 min of averaging. The arrows indicate the position of the lactate doublet centred at 1.33 p.p.m. None of the spectra showed lactate and Cramér-Rao lower bounds were larger than 20% in all spectra. Even if the four postexercise spectra were averaged, lactate was not detectable (not shown). The spectral resolution at rest was 0.06 p.p.m and postexercise 0.06–0.08 p.p.m., and the detection limit for lactate postexercise was 1.5 mM. The metabolites detectable in the spectra are *N*-acetylaspartate (NAA; 2.02 p.p.m and 2.06 p.p.m), glutamine + glutamate (Glx; 2.05–2.5 p.p.m and 3.65–3.85 p.p.m), total creatine (Cr; 3.03 and 3.9 p.p.m), total choline (Cho; 3.22 p.p.m), and *myo*-inositol (ml; 3.6 p.p.m). The concentration of metabolites detected in the normal human brain ranges typically from 1 to 10 mM. The broader components of the baseline represent mainly macromolecules and metabolites at lower concentrations that are usually not assigned.

MRS lactate measurements. However, the  $^1\text{H}$ -MRS signal from lactate was not detectable in the brain following exercise. Such calculations indicate that the lactate taken up by the brain does not accumulate in a distribution volume.

The lactate taken up by the brain is likely to be metabolized (Smith *et al.* 2003). The necessary transporters for the blood–brain barrier, neurones and astrocytes have been characterized (Dringen *et al.* 1995; Koehler-Stec *et al.* 1998). Lactate is oxidized by neuronal tissue *in vitro* (Larrabee, 1995, 1996) and is of importance for synaptic function (Schurr *et al.* 1988; Brown *et al.* 2003). The ‘lactate shuttle’ hypothesis incorporates such findings by linking neuronal activity with glycolysis and glycogenolysis in astrocytes. Lactate is then released into the interstitium and subsequently taken up and oxidized by neurones (Pellerin & Magistretti, 1994; Tsacopoulos & Magistretti, 1996). Engagement of a lactate shuttle during cerebral activation is supported by a more than twofold increase of lactate in the visual cortex with photic stimulation (Sapppay-Mariner *et al.* 1992). Equally, in the rat extracellular lactate increases in motor control areas (striatum) during exercise (De Bruin *et al.* 1990). In the present study, the high lactate influx to the brain could attenuate such intercellular trafficking of lactate.

### The cerebral metabolic ratio

Brain activity increases in proportion to exercise intensity as illustrated by a local increase in blood flow to brain areas responsible for initiation, integration and coordination of exercise (Williamson *et al.* 1999; Delp *et al.* 2001). Accordingly, the whole-brain metabolic response to exercise (Dalsgaard *et al.* 2003) matches that of stimulated brain regions (Fox *et al.* 1988). Following exercise in this study, the reduction in the cerebral ratio of  $\text{O}_2/\text{glucose}$  reflects a large increase in  $\text{AV}_{\text{glc}}$  as opposed to a moderate increase in  $\text{AV}_{\text{O}_2}$ . This differs from situations of less intense physical activity where the decrease in  $\text{O}_2/\text{glucose}$  is associated with a stable  $\text{AV}_{\text{O}_2}$  (Schmalbruch *et al.* 2002), or with a 20% increase in  $\text{AV}_{\text{O}_2}$  only after brain activation (Ide *et al.* 2000; Schmalbruch *et al.* 2002). The reduction in the cerebral metabolic ratio by almost 40% is provoked otherwise only during maximal leg exercise in hyperthermia (Nybo *et al.* 2003) or if the cerebral lactate uptake is included in the equation (Ide *et al.* 2000). An additive effect of superimposing arm exercise on leg exercise may contribute to the increase in  $\text{AV}_{\text{O}_2}$ . When  $\text{AV}_{\text{lac}}$  was taken into account, the cerebral metabolic ratio decreased further to  $\sim 50\%$  of control by the end of exercise. It is a consistent observation that the cerebral metabolic ratio reaches the nadir 1–2 min into the recovery

rather than at the peak of exercise where brain activity would be assumed to be highest (Ide *et al.* 2000; Dalsgaard *et al.* 2002; Nybo *et al.* 2003). Perhaps at cessation of exercise CBF mirrors the drop in MAP and cardiac output whilst cerebral metabolism remains high, or the relatively higher arterial concentration of glucose (47%) and lactate (14%) allows for a larger cerebral uptake.

The cerebral metabolic ratio stayed low during the first minutes of the recovery to return to baseline over the 30 min observation period. Since this ratio does not appear to overshoot, the surplus glucose plus lactate taken up during and after exercise is not oxidized within the time frame of the experiment. Thus, it is either oxidized later, stored in the brain, or released in a different form than glucose or lactate.

Glucose can provide the carbon skeleton for neurotransmitters as glutamate and  $\gamma$ -aminobutyric acid (GABA) and enhanced production may contribute to the reduction in the cerebral metabolic ratio (Cruz & Dienel, 2002). However, enlargement of glutamate and glutamine pools after exhaustive exercise in humans is not communicated as a release from the brain (Dalsgaard *et al.* 2002). Alternatively, restoration of brain glycogen may play a role for the surplus of glucose taken up in response to cerebral activation (Madsen *et al.* 1995a, 1999) and perhaps even during activation (Shulman *et al.* 2001; Schmalbruch *et al.* 2002). In the latter case lactate may efflux from the brain when the plasma concentration is low (Madsen *et al.* 1995b) but that is not confirmed during exercise. However,  $\text{AV}_{\text{lac}}$  represents a net balance between the cerebral uptake and a potential release. Moreover, repletion of large brain glycogen stores may require more than three times the period that leads to its depletion (Dienel *et al.* 2002) and could continue to a level even higher than at rest (Choi *et al.* 2003). The fate of the additional glucose and lactate taken up by the brain remains speculative. We can only conclude that the uptake seems directed in that there is no accumulation of these substances within the brain.

### References

- Abi-Saab WM, Maggs DG, Jones T, Jacob R, Srihari V, Thompson J, Kerr D, Leone P, Krystal JH, Spencer DD, During MJ & Sherwin RS (2002). Striking differences in glucose and lactate levels between brain extracellular fluid and plasma in conscious human subjects: effects of hyperglycemia and hypoglycemia. *J Cereb Blood Flow Metab* **22**, 271–279.
- Ahlborg G & Wahren J (1972). Brain substrate utilization during prolonged exercise. *Scand J Clin Laboratory Invest* **29**, 397–402.

- Avogaro A, Nosadini R, Doria A, Tremolada C, Baccaglioni U, Ambrosio F, Merkel C, Nosadini A, Trevisan R & Fioretto P (1990). Substrate availability other than glucose in the brain during euglycemia and insulin-induced hypoglycemia in dogs. *Metabolism* **39**, 46–50.
- Borg G (1970). Perceived exertion as an indicator of somatic stress. *Scand J Rehabil Med* **2**, 92–98.
- Brown AM, Tekkok SB & Ransom BR (2003). Glycogen regulation and functional role in mouse white matter. *J Physiol* **549**, 501–512.
- Choi IY, Lee SP, Kim SG & Gruetter R (2001). *In vivo* measurements of brain glucose transport using the reversible Michaelis-Menten model and simultaneous measurements of cerebral blood flow changes during hypoglycemia. *J Cereb Blood Flow Metab* **21**, 653–663.
- Choi IY, Seaquist ER & Gruetter R (2003). Effect of hypoglycemia on brain glycogen metabolism *in vivo*. *J Neurosci Res* **72**, 25–32.
- Cruz NF & Dienel GA (2002). High glycogen levels in brains of rats with minimal environmental stimuli: implications for metabolic contributions of working astrocytes. *J Cereb Blood Flow Metab* **22**, 1476–1489.
- Dager SR, Marro KI, Richards TL & Metzger GD (1992). Localized magnetic resonance spectroscopy measurement of brain lactate during intravenous lactate infusion in healthy volunteers. *Life Sci* **51**, 973–985.
- Dalsgaard MK, Ide K, Cai Y, Quistorff B & Secher NH (2002). The intent to exercise influences the cerebral O<sub>2</sub>/carbohydrate uptake ratio in humans. *J Physiol* **540**, 681–689.
- Dalsgaard MK, Nybo L, Cai Y & Secher NH (2003). Cerebral metabolism is influenced by muscle ischaemia during exercise in humans. *Exp Physiol* **88**, 297–302.
- De Bruin LA, Schasfoort EM, Steffens AB & Korf J (1990). Effects of stress and exercise on rat hippocampus and striatum extracellular lactate. *Am J Physiol* **259**, R773–R779.
- Delp M, Armstrong R, Godfrey D, Laughlin M, Ross C & Wilkerson M (2001). Exercise increases blood flow to locomotor, vestibular, cardiorespiratory and visual regions of the brain in miniature swine. *J Physiol* **533**, 849–859.
- Dienel GA, Wang RY & Cruz NF (2002). Generalized sensory stimulation of conscious rats increases labeling of oxidative pathways of glucose metabolism when the brain glucose-oxygen uptake ratio rises. *J Cereb Blood Flow Metab* **22**, 1490–1502.
- Dringen R, Peters H, Wiesinger H & Hamprecht B (1995). Lactate transport in cultured glial cells. *Dev Neurosci* **17**, 63–69.
- Fox PT, Raichle ME, Mintun MA & Dence C (1988). Nonoxidative glucose consumption during focal physiologic neural activity. *Science* **241**, 462–464.
- Hasselbalch SG, Knudsen GM, Jakobsen J, Hageman LP, Holm S & Paulson OB (1994). Brain metabolism during short-term starvation in humans. *J Cereb Blood Flow Metab* **14**, 125–131.
- Ide K, Schmalbruch IK, Quistorff B, Horn A & Secher NH (2000). Lactate, glucose and O<sub>2</sub> uptake in human brain during recovery from maximal exercise. *J Physiol* **522**, 159–164.
- King P, Kong MF, Parkin H, Macdonald IA, Barber C & Tattersall RB (1998). Intravenous lactate prevents cerebral dysfunction during hypoglycaemia in insulin-dependent diabetes mellitus. *Clin Sci* **94**, 157–163.
- Koehler-Stec EM, Simpson IA, Vannucci SJ, Landschulz KT & Landschulz WH (1998). Monocarboxylate transporter expression in mouse brain. *Am J Physiol Endocrinol Metab* **275**, E516–E524.
- Larrabee MG (1995). Lactate metabolism and its effects on glucose metabolism in an excised neural tissue. *J Neurochem* **64**, 1734–1741.
- Larrabee MG (1996). Partitioning of CO<sub>2</sub> production between glucose and lactate in excised sympathetic ganglia, with implications for brain. *J Neurochem* **67**, 1726–1734.
- Madsen PL, Cruz NF & Dienel GA (1995a). Metabolite flux to and from brain and levels of metabolites in brain of rats during rest, sensory stimulation, and recovery. *J Cereb Blood Flow Metab* **15**, S77.
- Madsen PL, Cruz NF, Sokoloff L & Dienel GA (1999). Cerebral oxygen/glucose ratio is low during sensory stimulation and rises above normal during recovery: excess glucose consumption during stimulation is not accounted for by lactate efflux from or accumulation in brain tissue. *J Cereb Blood Flow Metab* **19**, 393–400.
- Madsen PL, Hasselbalch SG, Hagemann LP, Olsen KS, Bulow J, Holm S, Wildschiodtz G, Paulson OB & Lassen NA (1995b). Persistent resetting of the cerebral oxygen/glucose uptake ratio by brain activation: evidence obtained with the Kety-Schmidt technique. *J Cereb Blood Flow Metab* **15**, 485–491.
- Magistretti PJ & Pellerin L (1997). Metabolic coupling during activation. A cellular view. *Adv Exp Med Biol* **413**, 161–166.
- Michaelis T, Merboldt KD, Bruhn H, Hanicke W & Frahm J (1993). Absolute concentrations of metabolites in the adult human brain *in vivo*: quantification of localized proton MR spectra. *Radiology* **187**, 219–227.
- Nielsen HB, Bredmose PP, Stromstad M, Volianitis S, Quistorff B & Secher NH (2002). Bicarbonate attenuates arterial desaturation during maximal exercise in humans. *J Appl Physiol* **93**, 724.
- Nilsson C, Lindvall-Axelsson M & Owman C (1992). Neuroendocrine regulatory mechanisms in the choroid plexus-cerebrospinal fluid system. *Brain Res Brain Res Rev* **17**, 109–138.
- Nybo L, Moller K, Volianitis S, Nielsen B & Secher NH (2002). Effects of hyperthermia on cerebral blood flow and metabolism during prolonged exercise in humans. *J Appl Physiol* **93**, 58–64.

- Nybo L, Nielsen B, Blomstrand E, Moller K & Secher N (2003). Neurohumoral responses during prolonged exercise in humans. *J Appl Physiol* **95**, 1125–1131.
- Pellerin L & Magistretti PJ (1994). Glutamate uptake into astrocytes stimulates aerobic glycolysis: a mechanism coupling neuronal activity to glucose utilization. *Proc Natl Acad Sci U S A* **91**, 10625–10629.
- Plum F & Posner JB (1967). Blood and cerebrospinalfluid lactate during hyperventilation. *Am J Physiol* **212**, 864–870.
- Provencher SW (1993). Estimation of metabolite concentrations from localized in vivo proton NMR spectra. *Magn Reson Med* **30**, 672–679.
- Rivers EP, Paradis NA, Martin GB, Goetting ME, Rosenberg JA, Smithline HA, Appleton TJ & Nowak RM (1991). Cerebral lactate uptake during cardiopulmonary resuscitation in humans. *J Cereb Blood Flow Metab* **11**, 479–484.
- Sandström K, Nilsson K, Andreasson S & Larsson LE (1999). Open heart surgery; pump prime effects and cerebral arteriovenous differences in glucose, lactate and ketones. *Paediatr Anaesth* **9**, 53–59.
- Sappey-Marinié D, Calabrese G, Fein G, Hugg JW, Biggins C & Weiner MW (1992). Effect of photic stimulation on human visual cortex lactate and phosphates using  $^1\text{H}$  and  $^{31}\text{P}$  magnetic resonance spectroscopy. *J Cereb Blood Flow Metab* **12**, 584–592.
- Schmalbruch IK, Linde R, Paulson OB & Madsen PL (2002). Activation-induced resetting of cerebral metabolism and flow is abolished by beta-adrenergic blockade with propranolol. *Stroke* **33**, 251–255.
- Schurr A, West CA & Rigor BM (1988). Lactate-supported synaptic function in the rat hippocampal slice preparation. *Science* **240**, 1326–1328.
- Shulman RG, Hyder F & Rothman DL (2001). Cerebral energetics and the glycogen shunt: neurochemical basis of functional imaging. *Proc Natl Acad Sci U S A* **98**, 6417–6422.
- Smith D, Pernet A, Hallett WA, Bingham E, Marsden PK & Amiel SA (2003). Lactate: a preferred fuel for human brain metabolism in vivo. *J Cereb Blood Flow Metab* **23**, 658–664.
- Tsacopoulos M & Magistretti PJ (1996). Metabolic coupling between glia and neurons. *J Neurosci* **16**, 877–885.
- Veneman T, Mitrakou A, Mokan M, Cryer P & Gerich J (1994). Effect of hyperketonemia and hyperlacticacidemia on symptoms, cognitive dysfunction, and counterregulatory hormone responses during hypoglycemia in normal humans. *Diabetes* **43**, 1311–1317.
- Williamson JW, McCollR, Mathews D, Ginsburg M & Mitchell JH (1999). Activation of the insular cortex is affected by the intensity of exercise. *J Appl Physiol* **87**, 1213–1219.
- Yao H, Sadoshima S, Fujii K, Kusuda K, Ishitsuka T, Tamaki K & Fujishima M (1987). Cerebrospinal fluid lactate in patients with hepatic encephalopathy. *Eur Neurol* **27**, 182–187.

### Acknowledgements

This study was supported by The Danish National Research Foundation Grant 504-4, Danish Medical Research Council, Grant 52-00-0098, with contribution from the John and Birthe Meyer Foundation to the MRS scanner used. M.K.D. was supported by the University of Copenhagen Medical Faculty Foundation and by the Medical Society of Copenhagen. We thank J. Westergaard (Braun, Germany) for providing the spinal needles and Frank Pott, P. Nissen and Nine Scherling for technical support.
