# Supplementary material
Source: PubMed Central journal article supplement (PMC3755547)
Supplement: 313738_1_En_221_MOESM4_ESM.pdf [file 313738_1_En_221_MOESM4_ESM.pdf]

# PostScript

## LETTERS

### Fatal encephalopathy after an isolated overdose of cocaine

Cocaine-induced brain damage can be divided into primary neurotoxic effects causing toxic encephalopathy, secondary effects of compromised cerebral blood flow in ischaemic and haemorrhagic stroke, cerebral vasculitis and vasospasm, and tertiary effects due to hypoxia as a result of cardiopulmonary collapse. Toxic leucoencephalopathy mainly affects white matter (WM) tracts serving higher cerebral function, thereby leading to altered personality, attention deficits and memory impairment in mild cases and to dementia, coma and brain death in severe cases. There are numerous legal and illegal substances provoking toxic encephalopathy, which could develop gradually or acutely.<sup>1-4</sup> This is, to our knowledge, the first report of fatal cocaine-associated encephalopathy, in a patient who had not taken cocaine previously, assessed by proton nuclear magnetic resonance spectroscopy (<sup>1</sup>H-MRS).

### Case report

A 21-year-old man had recurrent episodes of depression. He was found breathing and deeply comatose in a hotel room with injection marks in the left cubital vein. A syringe and a farewell letter were beside him; 14 empty packages with

tracks of white powder, later identified as cocaine, were found close by.

On admission he was unresponsive and intubated with intact brain stem reflexes. There was bilateral hyperreflexia and moderately increased muscle tone, but normal plantar reflexes. Blood assays showed mild metabolic acidosis (pH 7.30) with initially elevated liver enzyme concentrations (alanine aminotransferase 530 U/l); rhabdomyolysis (myoglobin 38 000 µg/l) and leucocytosis (17 billions/l); dehydration with increased creatinine (0.32 mmol/l); and hyperkalaemia (5.7 mmol/l). Urine toxicology screening was positive only for cocaine. The patient was treated for aspiration pneumonia with normalisation of all blood assays during the next days. The initial CT examination of brain without contrast was normal. EEG after 3 and 12 days revealed diffuse 2-4 Hz activity with periodically 2-30 s long episodes of EEG flattening and lack of response to visual or tactile stimulation. MRI of the brain on day 21 showed diffuse symmetrical WM changes in the cerebrum with hyperintense signal on the T<sub>2</sub>-weighted images (fig 1). Brain stem and cerebellum appeared normal. No contrast enhancement was observed. Magnetic resonance angiography was unremarkable.

The patient had <sup>1</sup>H-MRS on day 21. Two volumes of interest, 25×25×20 mm in occipitoparietal WM and 21×27×20 mm in mid-occipital grey matter (GM), were examined using stimulated echo acquisition mode

(STEAM) at 1.5 T; echo time 20 ms, TM interval 30 ms, repetition time 1500 ms and 128 averages (fig 2).

In WM (fig 2A), N-acetylaspartate (NAA) was <10% and total creatine (Cr) was <20% of the values in healthy controls. Highly reduced NAA and Cr indicated major neuroaxonal injury and loss of tissue integrity. Myo-inositol (MI) and glutamine+glutamate (Glx) were decreased to a third of normal values, whereas lactate, lipids and macromolecules were increased. Lactate concentration was approximately 3 mM. Total choline (Cho) was normal. The WM spectrum was consistent with severe toxic encephalopathy and demyelination.

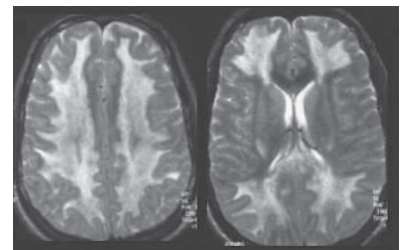

**Figure 1** T<sub>2</sub>-weighted images 21 days after a single overdose of intravenous cocaine reveal marked white matter hyperintensities with preservation of U-fibres.

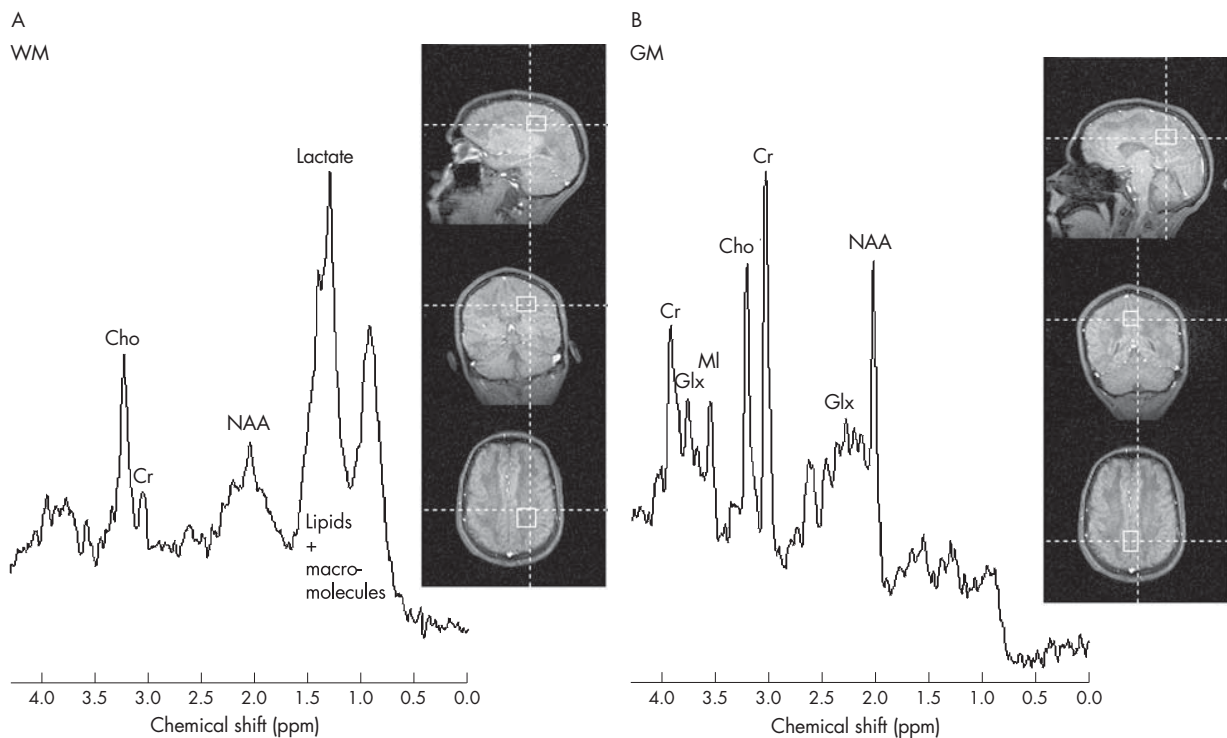

**Figure 2** Proton nuclear magnetic resonance spectroscopy on day 21 after admission in (A) occipitoparietal white matter (WM) and (B) mid-occipital grey matter (GM) shows severe metabolic derangement with substantial decreases in N-acetyl aspartate (NAA), myo-inositol (MI) and creatine (Cr) in both GM and WM, and demyelination with increased lactate, lipids and macromolecules in WM. Cho, Choline; Glx, glutamine+glutamate.

In GM (fig 2B), NAA reached 40% of control values, once again indicating impaired neuronal function. Cr was reduced to about 80%, and MI to 66% of control levels. There were normal amounts of Glx and Cho. Lipids and macromolecules were not detected, and lactate was <0.5 mM.

Due to the lack of clinical improvement, highly abnormal MRI and severe axonal and neuronal injury indicated by magnetic resonance spectroscopy, treatment was reduced to palliative care. At 24 days after admission, the patient died of pneumonia without having regained consciousness. Autopsy revealed severe leucoencephalopathy with pronounced demyelination, lipid-loaded macrophages and liquefying of the central cerebral WM. However, the cortex, subcortical WM including U-fibres, brain stem, cerebellum and notably the hippocampus appeared relatively intact on gross examination and histology. There was no inflammatory infiltration of the cerebral vessels.

## Discussion

Toxic leucoencephalopathy has been described with intravenous and inhalative consumption of cocaine, heroine and other drugs of misuse. Whereas the clinical picture varies extensively,<sup>2-5</sup> the radiological and histological findings are quite characteristic. Typically, T<sub>2</sub>-weighted MRI shows diffuse bihemispheric WM lesions, often with preservation of U-fibres<sup>2-5</sup> such as in our case. Although, in our patient, cocaine-induced cerebral vasculitis and vasospasms can be excluded from the differential diagnoses due to normal appearance of the cerebral vessels at histology and the diffuse symmetric manifestation of the WM lesions, the contribution of eventual hypoxic brain damage is more uncertain. However, CT examination of the brain 24 h after admission was normal and no episode of respiratory arrest had been registered at the time MRI and spectroscopy were performed. Also, sparing the hypoxia-sensitive hippocampi on histological examination makes a severe hypoxic brain injury improbable. It is also unlikely that the initial aspiration pneumonia, dehydration and hyperkalaemia should have caused leucoencephalopathy, since these conditions were quickly reversed and generally do not provoke such a clinical picture.

Although <sup>1</sup>H MRS has been used extensively in children with a variety of brain disorders and in adults mainly with traumatic brain injury, studies on acute toxic encephalopathy secondary to drug misuse are sparse.<sup>1-3</sup> The <sup>1</sup>H MRS spectrum obtained from our patient was coherent with an intense demyelination process, but differed from other demyelinating WM disorders such as multiple sclerosis in that a substantial lactate signal was detected. However, this corroborates earlier findings in toxic encephalopathy provoked by heroine<sup>3</sup> and simultaneous intoxication with amphetamine and morphine.<sup>1</sup> The increase in lactate points towards a conversion of aerobic metabolism to anaerobic energy production, but whether this is due to mitochondrial impairment secondary to hypoxia, due to macrophage invasion, or due to a direct consequence of cocaine-induced neuroaxonal toxicity remains unknown. Although the GM volume contained a smaller fraction of WM, not all the NAA reduction in the GM can be explained by partial volume effects. Instead, the reduction in cortical NAA could be interpreted as secondary neuronal impairment after leucoencephalopathy. In conclusion, the virtual total loss of NAA, severely decreased

creatine and significant elevation of lactate, lipids and macromolecules in the WM were consistent with massive demyelination and neuronal damage, which was confirmed by histopathological findings. It can be stated that the poor clinical picture and prognosis were mirrored by abnormalities revealed by <sup>1</sup>H-NMR spectroscopy, which therefore, might serve as a diagnostic tool in toxic encephalopathy secondary to overdose of drugs of misuse.

## Acknowledgements

The John and Birthe Meyer Foundation kindly donated the MRI system.

### D Kondziella

Department of Neurology, Rigshospitalet, Copenhagen University Hospital, Copenhagen, Denmark

### E R Danielsen

Department of Radiology, Rigshospitalet, Copenhagen University Hospital, Copenhagen, Denmark

### P Arlien-Soeborg

Department of Neurology, Rigshospitalet, Copenhagen University Hospital, Copenhagen, Denmark

Correspondence to: Dr D Kondziella, Department of Neurology, Sahlgrenska University Hospital, SE-41345 Gothenburg, Sweden; [daniel\\_kondziella@yahoo.com](mailto:daniel_kondziella@yahoo.com)  
Consent was obtained for publication of the patient's details described in this report.

doi: 10.1136/jnnp.2006.088955

Competing interests: None declared.

## References

- 1 Gottfried JA, Mayer SA, Shungu DC, *et al*. Delayed posthypoxic demyelination. Association with arylsulfatase A deficiency and lactic acidosis on protein MR spectroscopy. *Neurology* 1997;**49**:1400-4.
- 2 Maschke M, Fehlings T, Kastrop O, *et al*. Toxic leucoencephalopathy after intravenous consumption of heroin and cocaine with unexpected clinical recovery. *J Neurol* 1999;**246**:850-1.
- 3 Vella S, Kreis R, Lovblad KO, *et al*. Acute leucoencephalopathy after inhalation of a single dose of heroin. *Neuropediatrics* 2003;**34**:100-4.
- 4 Ryan A, Molloy FM, Farrell MA, *et al*. Fatal toxic leucoencephalopathy: clinical, radiological, and necropsy findings in two patients. *J Neurol Neurosurg Psychiatry* 2005;**76**:1014-6.
- 5 Bartlett E, Mikulis DJ. Chasing "Chasing the dragon" with MRI: leucoencephalopathy in drug abuse. *Br J Radiol* 2005;**78**:997-1004.

## Dramatic response to levetiracetam in post-ischaemic Holmes' tremor

Holmes' tremor refers to an unusual combination of rest, postural and kinetic tremor of extremities. Common causes of Holmes' tremor include stroke, trauma, vascular malformations and multiple sclerosis, with lesions involving the thalamus, brain stem or cerebellum.<sup>1</sup> Although some drugs (eg, levodopa and dopaminergic drugs, clonazepam and propranolol) have been occasionally reported to give some benefit, medical treatment of Holmes' tremor is unsatisfactory, and many patients require thalamic surgery to achieve satisfactory control.<sup>2</sup>

We report a patient in whom post-ischaemic Holmes' tremor dramatically responded to levetiracetam treatment.

A 61-year-old right-handed man with a history of polycythaemia vera suddenly developed

dizziness, diplopia and ataxia in February 2006. A CT scan showed a left cerebellar haemorrhagic infarction. Within a few days, his neurological state gradually improved. However, in March 2006, a coarse, slowly progressive tremor arose in his left upper extremity. On admission to our hospital, the man was alert and orientated. His blood pressure was 130/85 mm Hg and pulse 80/min. Serum electrolytes, urea, creatinine, bicarbonate, liver transaminases, thyroxine, triiodothyronine, and thyroid-stimulating hormone were normal. Blood analysis showed  $5.8 \times 10^3$  cells/mm<sup>3</sup> of red blood cells, 17 g/dl of haemoglobin and 49.5% of haematocrit. On examination, a severe-intensity, mainly proximal, slow, large-amplitude resting tremor was observed on the left upper limb (fig 1A). Tremor was also present during posture and intentional movements, and was worsened by emotional distress and any attempts to inhibit it. No associated rigidity was observed. Tremor was exhausting and rendered the arm useless, preventing the patient from feeding and caring for himself. However, it stopped during sleep. No associated palatal tremor, nystagmus, signs of brain stem dysfunction, chorea, dystonia, bradykinesia or rigidity was present. Finger-to-nose test showed both dysmetria and incoordination on the left side. No deficits of position, vibratory sense, and superficial sensation of light touch and pain were observed. EEG was unremarkable. Surface electromyograms showed rhythmic grouping discharges of 3.5 Hz in the left proximal forearm muscles (fig 1C). Jerk-locked averaging analysis failed to show a cortical origin of the tremor. Brain MRI showed left cerebellar infarction with involvement of the superior and inferior semilunar lobules, left cerebellar tonsil and of the vermis (further details are provided in the supplementary figure available online at <http://jnnp.bmj.com/supplemental>). No evidence of other brain abnormalities was observed. The tremor was nearly incessant during wakefulness and disappeared during sleep. Diagnosis of Holmes' tremor was made, but initial treatment with clonazepam and propranolol was ineffective. The patient refused to take dopaminergic agents and levetiracetam was started, 1000 mg three times daily. After 24 h, the tremor was markedly reduced and the man was able to carry out most daily activities by himself. One day later, the tremor completely disappeared, with complete alleviation of all components (fig 1B). The drug was well tolerated. The patient was discharged, but 2 weeks later he was readmitted, owing to the reappearance of the tremor 2 days after levetiracetam self-discontinuation. Levetiracetam was reintroduced (1000 mg twice daily) and the patient promptly regained the functional use of the arm. At the last visit in August 2006, he maintained his improvement with no sign of toxicity.

The movement disorder shown by this patient fulfilled the criteria of Holmes' tremor<sup>1</sup>: predominantly unilateral tremor; occurring not only at rest but also in posture and during movement, and disappearing during sleep; low frequency (3-5 Hz); and exacerbation by goal-directed movements. Although brain stem lesions are usually found in patients with Holmes' tremor, lesions involving the thalamus or the cerebellum may also cause this movement disorder as they probably interrupt the neighbouring cerebellothalamic and nigrostriatal fibres.<sup>1</sup>

Holmes' tremor usually begins weeks to months after the insult, but the reasons for this delayed onset are not fully understood. Compensatory or secondary changes in nervous system function may contribute to tremor genesis. However, both the dopaminergic

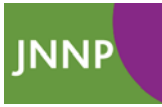

## Fatal encephalopathy after an isolated overdose of cocaine

D Kondziella, E R Danielsen and P Arlien-Soeborg

*J Neurol Neurosurg Psychiatry* 2007 78: 437-438 originally published online October 6, 2006  
doi: 10.1136/jnp.2006.088955

---

Updated information and services can be found at:

<http://jnp.bmj.com/content/78/4/437.full.html>

---

*These include:*

### References

This article cites 5 articles, 3 of which can be accessed free at:  
<http://jnp.bmj.com/content/78/4/437.full.html#ref-list-1>

### Email alerting service

Receive free email alerts when new articles cite this article. Sign up in the box at the top right corner of the online article.

---

### Notes

---

To request permissions go to:

<http://group.bmj.com/group/rights-licensing/permissions>

To order reprints go to:

<http://journals.bmj.com/cgi/reprintform>

To subscribe to BMJ go to:

<http://group.bmj.com/subscribe/>
