# Supplementary material
Source: PubMed Central journal article supplement (PMC3755547)
Supplement: 313738_1_En_221_MOESM6_ESM.pdf [file 313738_1_En_221_MOESM6_ESM.pdf]

# Hereditary spastic paraplegia caused by the *PLP1* 'rumpshaker mutation'

Kirsten Svenstrup,<sup>1,2</sup> Geneviève Giraud,<sup>3</sup> Odile Boespflug-Tanguy,<sup>3,4</sup> Else R Danielsen,<sup>5</sup> Carsten Thomsen,<sup>5</sup> Kirsten Rasmussen,<sup>6</sup> Ian Law,<sup>7</sup> Asmus Vogel,<sup>2</sup> Jette Stokholm,<sup>2</sup> Clarissa Crone,<sup>8</sup> Lena E Hjerminde,<sup>1,2</sup> Jørgen E Nielsen<sup>1,2</sup>

<sup>1</sup>Section of Neurogenetics, Department of Cellular and Molecular Medicine, University of Copenhagen, Copenhagen, Denmark

<sup>2</sup>Memory Disorders Research Group, Rigshospitalet, University Hospital of Copenhagen, Copenhagen, Denmark

<sup>3</sup>INSERM UMR 931-CNRS 6247, GReD, Clermont University, Faculty of Médecine Clermont-Ferrand, Clermont-Ferrand, France

<sup>4</sup>CHU de Clermont-Ferrand, Department of Human Genetics, Reference Center for

Leukodystrophies, Clermont-Ferrand, France

<sup>5</sup>Department of Radiology, Rigshospitalet, University Hospital of Copenhagen, Copenhagen, Denmark

<sup>6</sup>Department of Clinical Genetics, University Hospital of Odense, Odense, Denmark

<sup>7</sup>Department of Clinical Physiology, Nuclear Medicine and PET, Rigshospitalet, University Hospital of Copenhagen, Copenhagen, Denmark

<sup>8</sup>Department of Clinical Neurophysiology, Rigshospitalet, University Hospital of Copenhagen, Copenhagen, Denmark

## Correspondence to

Dr Kirsten Svenstrup, Section of Neurogenetics, The Panum Institute, Building 24.4, Blegdamsvej 3b, DK-2200 Copenhagen N, Denmark; [ksvenstrup@sund.ku.dk](mailto:ksvenstrup@sund.ku.dk)

Received 9 April 2009

Revised 5 October 2009

Accepted 20 October 2009

## ABSTRACT

**Background** Hereditary spastic paraplegia (HSP) is a group of clinically and genetically heterogeneous neurodegenerative disorders characterised by progressive spasticity and weakness in the lower limbs. Mutations in *PLP1* on the X chromosome cause spastic paraplegia type 2 (SPG2) or the allelic Pelizaeus–Merzbacher Disease (PMD). The *PLP1* protein is a major myelin protein involved in stabilisation and maintenance of the myelin sheath. The function of the protein has been studied in the rumpshaker mouse, which is a model of SPG2/PMD.

**Objective** To characterise the phenotype of patients with the 'rumpshaker mutation.'

**Patients** A family with HSP caused by the 'rumpshaker mutation.'

**Results** The patients showed nystagmus during infancy and had early onset of HSP. They had normal cognition, and cerebral MRI showed relatively unspecific white matter abnormalities on T2 sequences without clear progression. Urinary urgency was reported among the female carriers. MRS of both patients showed increased myo-inositol in the white matter, while decreased N-acetylaspartate was found exclusively in the oldest patient. All evoked potential examinations were compatible with severe central demyelination, while no signs of peripheral demyelination or axonal degeneration were found. <sup>18</sup>F-FDG-PET scans were normal.

**Conclusion** The phenotypes of the patients reported here are the mildest described to be caused by the rumpshaker mutation and represent the mildest form among the spectrum of *PLP1* related disorders. No definite symptoms in the female carriers could be ascribed to the mutation. These data suggest the pathology to be an underlying dysmyelinating disorder in combination with a central axonal degeneration.

## INTRODUCTION

Hereditary spastic paraplegia (HSP) is a group of neurodegenerative disorders characterised by slowly progressive spasticity and weakness of the lower limbs in the pure form and additional neurological symptoms and signs in the complex form.<sup>1</sup> Inheritance can be autosomal dominant, autosomal recessive or X linked. At present, four loci linked to HSP are located on the X chromosome.<sup>2–5</sup> *L1CAM* and *PLP1* are the genes associated with SPG1 and SPG2 respectively, whereas the gene associated with SPG16 and SPG34 are presently unknown.

Mutations in *PLP1* give rise to the allelic diseases spastic paraplegia type 2 (SPG2) and Pelizaeus–Merzbacher disease (PMD). These diseases

can be seen as a spectrum in which pure SPG2 is the mildest form, and PMD form 0 or 'connatal' is the most severe form. SPG2 is characterised by spastic gait, autonomic dysfunction, normal intelligence and normal lifespan, whereas PMD form 0 includes neonatal stridor and nystagmus, seizures, severe hypotonia without neuromotor acquisitions followed by spastic quadriplegia, severe cognitive impairment and death before 10 years of age.<sup>6</sup>

Female carriers of *PLP1* mutations can display early-onset symptoms which improve over time or slowly progressive mild HSP with late onset. The probability of females being symptomatic rises if male relatives are only mildly affected or if the mutation in the family is a nonsense or null mutation.<sup>7</sup>

The *PLP1* protein and its splice variant DM20 have the highest expression in oligodendrocytes and constitute 50% of the myelin proteins. *PLP1* is involved in stabilisation and maintenance of the myelin sheath, and it plays a major role in axo-myelin interactions, whereas DM20 is assumed to be involved in oligodendrocyte maturation.<sup>8,9</sup> The function of the protein has been studied in a range of spontaneous and genetically engineered animal models including the spontaneous mutant rumpshaker mouse (*rsh*). The *rsh* displays a relatively benign phenotype with tremor and preserved lifespan.<sup>10</sup> It has an Ile187Thr mutation in *Plp1* (known as 'the rumpshaker mutation'),<sup>11</sup> corresponding to a mutation later found in a single family with HSP.<sup>12,13</sup> *Rsh* is therefore considered to be a good model of mild PMD/SPG2.

We identified the rumpshaker mutation in *PLP1* in a family with X linked HSP, and we report clinical and paraclinical data of affected males and female carriers from this family and compare the findings with previous reports of this specific mutation in humans and mice.

## METHODS

### Patients

A family displaying a possible X linked recessive inheritance of HSP with two affected male cousins (figure 1) was referred to the Section of Neurogenetics, Department of Cellular and Molecular Medicine, University of Copenhagen. The family was clinically examined, and blood samples were obtained.

The two affected male cousins underwent electrophysiological investigation, neuropsychological examination, MRI, MRS and <sup>18</sup>F-FDG-PET-scanning of the brain. Three female carriers of the

**Figure 1** Pedigree of the Danish family with PLP1 mutation. Open circle or square: asymptomatic. Filled square: affected by HSP. Dot in a circle: carrier of the PLP1 mutation. The first number beneath the symbol indicates the number of the individual in the generation. The second number beneath the symbol indicates the age of the individual. The arrow indicates the proband. The figure also shows the electropherograms for the genotyped individuals and the missense mutation in the sequence.

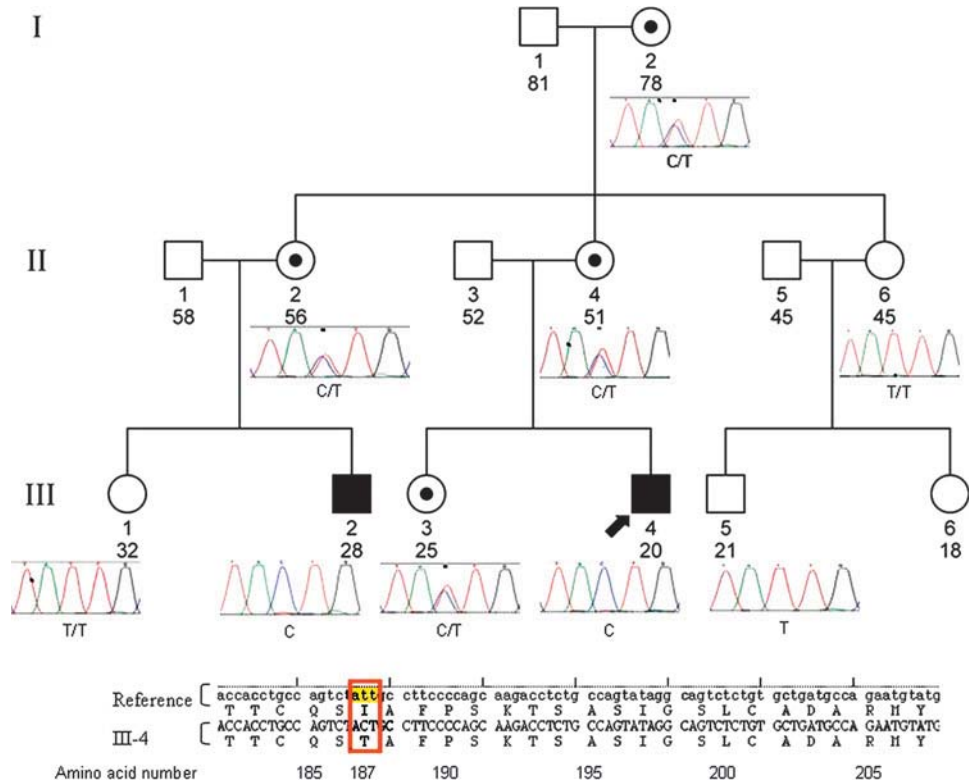

mutation underwent neuropsychological examination, MRI and MRS. The study was approved by the local ethics committee, and all participating individuals gave informed consent.

### Mutation detection

Genomic DNA was extracted from blood using Puregene DNA Purification Kit (Gentra Systems, Minneapolis, Minnesota). Linkage mapping of the X chromosome was performed using Abi Prism Linkage Mapping Sets v2.5 (Applied Biosystems, Foster City, California) with a resolution of 10 cM according to the manufacturer's recommendations. Seventeen additional microsatellite markers were included between the centromere and Xq23. Linkage and haplotype analysis were performed with Genehunter software v1.1.

Amplification of the 7 *PLP1* gene coding exons and their intron/exon boundaries was performed as previously reported.<sup>6</sup> Sequence reactions were performed with the BigDye v1.1 Terminator (Applied Biosystems) using the PCR primers and analysed using the Sequence Navigator software after migration on a capillary ABI PRISM 3100 Genetic Analyser (Applied Biosystems, Foster City, California, USA).

### Neuroimaging and spectroscopy

Magnetic resonance (MR) studies at 1.5 T Siemens Vision scanner included T<sub>1</sub>-, T<sub>2</sub>- and diffusion-weighted MR imaging including the calculated apparent diffusion coefficient (ADC) images, supplemented by localised proton MR spectroscopy. MR spectra (TE=20 ms, repetition time=3000 ms) were sampled from volumes of interest in occipito-parietal primarily white matter (WM), mid-occipital primarily grey matter (GM), and from the centrum semiovale in a location of affected white matter in HSP. Metabolites were quantified by the user-interaction-independent postprocessing LCModel<sup>14</sup> as previously described,<sup>15</sup> and normal controls from this study were used as reference for the HSP patients. N-acetylaspartate (NAA), total choline (Cho), total

creatine (Cr) and myo-inositol (mI) concentrations deviating more than 2 SD from normal were reported.

### PET

The distribution of relative regional cerebral glucose metabolic rate (rCMRglc) was measured using FDG PET scanning. PET scans were performed with a GE-Advance scanner operating in 3D-acquisition mode. Each patient received an intravenous bolus injection of approximately 200 MBq FDG while resting. After 30 min, a 10 min transmission scan was performed for attenuation correction followed by a 10 min emission scan. Images were fused to the T1 and T2 weighted MR scans. In addition to visual analysis, quantitative 3-D stereotactic surface projection (SSP) analysis (Neurostat) was employed, comparing each patient to a normal material.<sup>16</sup>

### Electrophysiology

Both patients underwent neurophysiological examinations including visual-evoked potential (VEP) with pattern-reversal stimulation of 18 mm squares at 2 Hz, and recording at Oz. Somatosensory-evoked potentials (SSEP) were evoked by stimulating the median and tibial nerve with surface electrodes at 1½ Hz at 1½ X motor threshold and recording, for the median nerve stimulation, at elbow, Erbs point, C7 and Cz and for tibial nerve stimulation at popliteal fossa, Th12 and Cz. Motor-evoked potentials (MEP) were evoked in muscles in upper and lower extremities by stimulating the cortex (just lateral to vertex) with a 90 mm round coil (MagStim) with at least 60% of maximal stimulation output. Root stimulation was performed by the stimulating at C7 and L4/L5 at 100% of maximal stimulation output. Peripheral nerve examination was performed by using surface electrode technique. The median, tibial, peroneal and sural nerves were examined. Quantitative electromyography (EMG) examination was performed in the anterior tibial muscle by collecting at least 20 different muscle action potentials

## Research paper

(MUP) with a concentric emg needle electrode. The mean duration and mean amplitude of the collected potentials were calculated, and the maximal interference pattern was observed and spontaneous activity was looked for in at least five different electrode positions. Brainstem auditory-evoked potentials (BAEP) were evoked only in one patient (III4) by 10 Hz click stimulation at 100 dB and recording at Cz and C7.

### Neuropsychology

The five individuals were all tested with a comprehensive neuropsychological battery. The following tests were administered:

general intellectual functioning: vocabulary and Information from Wechsler Adult Intelligence Scale (WAIS);

memory: Selective Reminding Test and Rey Complex Figure Test (3 min recall);

executive functions/psychomotor speed: Trail Making Test part A and B, Symbol Digit Modalities Test, Stroop Interference Test, Wisconsin Card Sorting Test, continuous subtraction (100–7), Digit span;

visuospatial functions: Rey Complex Figure Test (copy) and Block Design (WAIS);

language: verbal fluency (s-words and animal names in 1 min);

abstract reasoning: similarities (WAIS), Picture Arrangement (WAIS), Raven's Progressive Matrices Advanced (set 1), Picture

Completion (WAIS III) and Matrices (WAIS III). Test performances were compared with age-adjusted normative data.

## RESULTS

### Mutation detection

Linkage analysis showed  $Z_{\max}=1.02$  between markers DXS990 and DXS1105, a region of 14 Mb including the *PLP1* gene, and haplotype analysis did not exclude *PLP1* as a potential gene candidate. Sequencing of the *PLP1* coding region revealed a c.560 T→C transition in the third exon in the two affected male cousins and in four female carriers (figure 1). The mutation is predicted to result in an amino acid change from isoleucine to threonine in position 187 in the PLP protein (p.Ile187Thr) and corresponds to the previously reported 'rumpshaker mutation.'

### Patients

The pedigree of the family with the *PLP1* p.Ile187Thr mutation is shown in figure 1. A clinical synopsis of medical history and clinical signs is given for the patients in table 1 and for the female carriers in table 2. Nystagmus and hypotonia was noticed for both patients during infancy. They acquired independent walking around 2 years of age, developed a spastic paraplegia around age 3 and lost independent ambulation at 8 and 15 years of age, respectively. Both had school performances in the normal

**Table 1** Medical history and neurological examination of the two patients

|                          |                                           | Patient III2                                    | Patient III4                                |                                                                                          |
|--------------------------|-------------------------------------------|-------------------------------------------------|---------------------------------------------|------------------------------------------------------------------------------------------|
| Medical history          | Birth                                     | Delivery                                        | Normal at term                              |                                                                                          |
|                          |                                           | Birth weight                                    | 4050 g                                      |                                                                                          |
|                          |                                           | Malformations                                   |                                             |                                                                                          |
|                          | Motor milestones                          | Sitting independently                           | 8 months                                    | 8 months                                                                                 |
|                          |                                           | Crawling                                        | 13 months                                   | 13 months                                                                                |
|                          |                                           | Standing with support                           | 14 months                                   | 14 months                                                                                |
|                          |                                           | Walking independently                           | 22 months                                   | 27 months                                                                                |
|                          | Other symptoms                            | Hypotonia noticed                               | At birth                                    | 5 weeks old                                                                              |
|                          |                                           | Appearance/disappearance of nystagmus           | Birth/3 years                               | 5 months/2 years                                                                         |
|                          |                                           | Appearance of spasticity                        | 3 years                                     | 4 years                                                                                  |
|                          |                                           | Appearance of strabismus                        | 3 years                                     | 8 years                                                                                  |
|                          |                                           | Appearance of double vision and impaired vision |                                             | 8 years                                                                                  |
|                          | Operations                                | Appearance/disappearance of dystonia            |                                             | 15 years/16 years (left foot)                                                            |
|                          |                                           | Loss of independent gait                        | 15 years                                    | 8 years                                                                                  |
|                          |                                           | Rhizotomy performed                             | 15 years                                    | 8 years                                                                                  |
| Education                | Achilles tenotomies bilaterally performed | 7 and 9 years                                   | 10 years                                    |                                                                                          |
|                          | School performances                       | Normal                                          | Normal                                      |                                                                                          |
| Neurological examination | Head                                      | Finished education                              | 2 years of education in the office business |                                                                                          |
|                          |                                           | Profession                                      | IT supporter                                |                                                                                          |
|                          |                                           | Age at examination                              | 28                                          |                                                                                          |
|                          | Upper limbs                               | Dysarthria                                      | +                                           | +                                                                                        |
|                          |                                           | Strabismus                                      | Left eye                                    | Right eye                                                                                |
|                          |                                           | Eye movements                                   | Normal                                      | Slightly saccadic eye movements and a discrete horizontal nystagmus at gaze to the right |
|                          | Lower limbs                               | Strength and tone                               | Normal                                      | Normal                                                                                   |
|                          |                                           | Tendon reflexes                                 | Hyperactive                                 | Hyperactive                                                                              |
|                          | Other                                     | Strength and tone                               | Diminished                                  | Diminished                                                                               |
|                          |                                           | Patellar reflexes                               | Absent                                      | Absent (right)/hyperactive (left)                                                        |
| Achilles tendon reflexes |                                           | Absent (right)/clonus (left)                    | Hyperactive (right)/absent (left)           |                                                                                          |
| Plantar reflexes         |                                           | Extensor                                        | Extensor                                    |                                                                                          |
| Gait                     | Sensibility                               | Vibration sense diminished below chest          | Vibration sense diminished below ankle      |                                                                                          |
|                          | Gait                                      | Performed with two crutches/wheelchair          | Performed with two crutches/wheelchair      |                                                                                          |

**Table 2** Symptoms and signs in the female carriers

|                          |                   | Carrier I2                                                    | Carrier II2                                  | Carrier II4 |
|--------------------------|-------------------|---------------------------------------------------------------|----------------------------------------------|-------------|
| Symptoms                 |                   | Urinary urge and stress incontinence during 20 years          | Mild urinary urgency and stress incontinence |             |
| Profession               |                   | 7 years in school, no formal education, took care of children | Hair dresser                                 | Nurse       |
| Neurological examination | Age               | 78                                                            | 56                                           | 51          |
|                          | Gait              | Normal                                                        | Normal                                       | Normal      |
|                          | Patellar reflexes | Normal                                                        | Normal                                       | Normal      |
|                          | Achilles reflexes | Absent                                                        | Normal                                       | Normal      |
|                          | Plantar reflexes  | Atypical bilaterally                                          | Normal                                       | Normal      |
|                          | Vibration sense   | Diminished below ankles                                       | Normal                                       | Normal      |

range. Two female carriers had urinary urgencies around 50 years of age as the only complaint.

### MR imaging and MR spectroscopy of the brain

Data are summarised in table 3. Patient III4 had an MRI of the central nervous system performed at the local hospital at 7, 10 and 16 years of age (figure 2). At age 7, symmetrical, periventricular WM lesions were visible without clear progression over the years. Atrophy in terms of marked Virchow–Robin spaces was only visible at 20 years of age. Patient III2 had mild T2 hyperintensities with a more diffuse distribution in the cerebral WM (figure 2). MRI of the three female carriers showed no noticeable abnormalities. No FLAIR sequences were available. ADC was increased in abnormal WM signal regions but not in normal-appearing WM. Myoinositol was significantly increased in the MR spectroscopies in both patients. Lactate was not detected (figure 3) in any of the patients, not even in the most severely affected location in the centrum semiovale.

### <sup>18</sup>F-FDG-PET-scanning in affected patients

The <sup>18</sup>F-FDG-PET-scanning in both patients were normal.

### Neuropsychology

Patient III2, patient III4, carrier II2 and carrier II4 had performances within the normal range. Carrier I2 had significant impairments on complex executive tests (Trail Making Test B and Stroop Interference) and some tests for abstract reasoning (Raven's Advanced Matrices and Similarities). Her copy (and therefore also the recall) of the Rey Complex Figure Test was impaired. Other test performances were within the normal range. Thus, the neuropsychological test results for this indi-

vidual demonstrated cognitive impairment in executive functions but no general dementia. All patients and carriers showed normal behaviour without any signs of frontal-lobe dysfunction.

### Electrophysiology in patients (III2 and III4)

In both patients, VEP examination showed a severely prolonged latency to the cortical responses which were of normal amplitude. At stimulation of the median as well as the tibial nerve, the SSEP examination did in both cases show severely prolonged central conduction time or absent cortical responses, while peripheral responses were of normal latency and amplitude. In the oldest patient (III2), MEP examination also showed severely prolonged central conduction time to muscles in both arms and legs, while the root stimulation evoked muscle responses with normal latency and amplitude. The MEP examination of the youngest patient (III2) showed less pronounced changes, but the central conduction time was clearly prolonged to the responses in the left arm and leg. Examination of the peripheral nerves showed normal conduction velocity of motor and sensory fibres, and all responses were of normal amplitude. EMG examination revealed no spontaneous denervation activity, the mean duration and amplitude of MUPs were normal, and there were thus no signs of acute or chronic denervation. The maximal interference pattern was of normal amplitude but revealed that the patient had difficulties in exerting a constant maximal contraction, which is a typical finding in central lesions. BAEP were abnormal, showing increased central latency compatible with central demyelinating disease. Electrophysiological examination was not performed in the female carriers.

**Table 3** Summary of present MRI findings and MRS results deviating more than two SD from normal

|     |    | Carrier I2                                                                                                                                   | Carrier II2                                                                 | Carrier II4                                     | Patient III2                                                                                                                                                                                                  | Patient III4                                                                                                                                                                   |
|-----|----|----------------------------------------------------------------------------------------------------------------------------------------------|-----------------------------------------------------------------------------|-------------------------------------------------|---------------------------------------------------------------------------------------------------------------------------------------------------------------------------------------------------------------|--------------------------------------------------------------------------------------------------------------------------------------------------------------------------------|
| Age |    | 78                                                                                                                                           | 56                                                                          | 51                                              | 28                                                                                                                                                                                                            | 20                                                                                                                                                                             |
| MRI |    | Age-related changes with a few small deep WM lesions and slight central atrophy, no more than expected for age. Normal ADC in the WM: 79 GY. | An excess of small WM lesions, but no atrophy. Normal ADC in the WM: 81 GY. | Normal MR imaging. Normal ADC in the WM: 83 GY. | Periventricular WM lesions, multiple small deep WM lesions, slight cortical atrophy. Marked Virchow–Robin spaces. ADC was increased in the WM lesions (139 GY) but normal in the normal appearing WM (80 GY). | Periventricular WM lesions, marked Virchow–Robin spaces, but otherwise no atrophy. ADC was increased in the WM lesions (109 GY) but normal in the normal appearing WM (80 GY). |
| MRS | GM | No deviating results                                                                                                                         | Cr: +13% (+2.1 SD)<br>ml: +42% (+3.3 SD)                                    | NAA: -10% (-2.4 SD)                             | NAA: -11% (-2.7 SD)                                                                                                                                                                                           | NAA: +10% (+2.4 SD)<br>Cr: +18% (+2.8 SD)                                                                                                                                      |
|     | WM | No deviating results                                                                                                                         | NAA: -14% (-2.3 SD)                                                         | No deviating results                            | NAA: -10% (-2.4 SD)<br>Cr: +22% (+2.3 SD)<br>Cho: +22% (+2.3 SD)<br>ml: +55% (4.5 SD)                                                                                                                         | ml: +26% (+2.1 SD)                                                                                                                                                             |

ADC, apparent diffusion coefficient; Cho, total choline; Cr, creatine; GM, grey matter; ml, myo-inositol; NAA, N-acetylaspartate; WM, white matter.

## Research paper

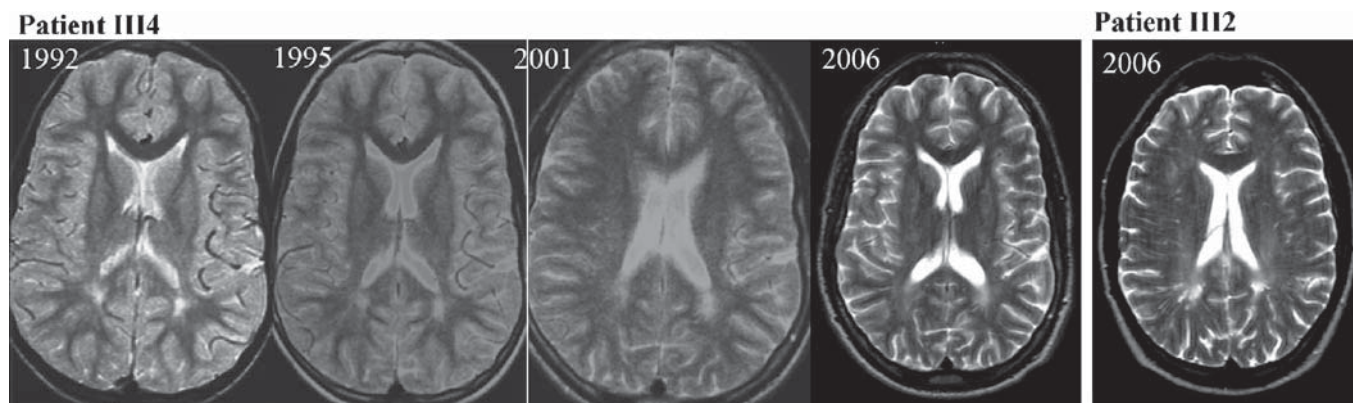

**Figure 2** T2 weighted MRI of patient III2 and III4. Patient III4 was 7 years of age in 1992, 10 years of age in 1995 and 16 years of age in 2001. Patient III2 was 28 years of age, and patient III4 was 20 years of age in 2006.

## DISCUSSION

Only one family with SPG2 caused by the rumpshaker mutation has previously been described.<sup>12 13 17–19</sup> In that family, clinical evaluation were possible for 10 among the 17 reported affected males at a mean age of  $36 \pm 27$  years. The level of handicap in the affected patients tended to converge after the third decade, suggesting a more severe progressive neuronal degradation than in patients with disease causing mutations in *SPAST* or *SPG3A* and with an onset before 10 years of age.<sup>20 21</sup> The phenotype in the patients described in the present study (table 1) corresponds to the mildest phenotype of the first reported family. The normal cognitive functions are reflected by the normal <sup>18</sup>F-FDG-PET scans. No specific phenotype of the female carriers reported here could be ascribed to the carrier status of the *PLP1* mutation in either the clinical or the paraclinical investigations. It remains elusive, though, whether the bladder dysfunction in the two carriers and the dysexecutive function in the oldest carrier could be due to the carrier status. Previously, no female carriers of the rumpshaker mutation have been described as symptomatic.<sup>13</sup>

The consecutive MRIs of the brain from patient III4 (figure 2) showed patchy areas of increased T2 intensity in the periventricular WM without clear progression. At 20 years of age, slight atrophy in terms of marked Virchow–Robin spaces was present. In patient III2, representing a later stage of the disease, the patchy areas of increased T2 intensities were more diffuse, but no previous scan was available to evaluate a potential progression. A corresponding patchy pattern was found on MRI from a 3.5-year-old boy, belonging to the family originally reported to carry the rumpshaker mutation,<sup>18 22</sup> but the hyperintensities were more pronounced and diffuse. These findings were associated with a more severe phenotype including delay in learning capacities. The MRI findings suggest a heterogeneous, patchy dysmyelinating process, reflecting the variable phenotypes caused by the rumpshaker mutation.

Initial absence of diffuse T2 lesions might have delayed the diagnosis of a dysmyelinating process in patient III4. However, the increased latency/central conduction time observed in the VEPs, BAEPs, MEPs and SSEPs in our patients is compatible with a dysmyelinating disease and strongly argues for analysis of *PLP1*. Interestingly, the BAEPs and VEPs were reported to be normal in the previously mentioned 3.5-year-old boy also carrying the rumpshaker mutation.<sup>22</sup> Extensive absence of myelination of the lateral and ventral corticospinal tracts and of the dorsal and ventral spinocerebellar tracts have been reported at autopsy of a 63-year-old patient with the rumpshaker

mutation.<sup>17</sup> Correspondingly, a dysmyelination process in terms of axons with no myelin sheaths or abnormally thin myelin sheaths has been described in *rsh*.<sup>10</sup> Later in life also, axonal degeneration has been described in *rsh*.<sup>23</sup> Considering the relatively mild phenotype, more HSP patients compatible with X linked inheritance, early onset and unspecific mild WM abnormalities on MRI might be candidates for *PLP1* mutation screening, especially when supported by increased central conduction time in evoked potentials, which is indicative of a central demyelinating (or dysmyelinating) disease.

MRS data from the patients are difficult to interpret. Both patients had raised levels of ml in the white matter indicating gliosis<sup>24</sup> consistent with the finding of increased glia cell number and density in *rsh*.<sup>10</sup> Patient III2 also had reduced NAA and raised Cr and Cho in the white matter, while the levels of these metabolites were within the normal range in patient III4. Previously, MRS data on metabolite ratios from the 3.5-year-old affected boy with the rumpshaker mutation was published,<sup>22</sup> but differences between methods make the results difficult to compare. The increase in Cho observed in patient III2 is comparable with other demyelinating leucodystrophies<sup>25</sup> and represents a changed membrane turnover as seen when membranes break down, and it is in contrast to the observed decrease in Cho in PMD where myelin is not formed properly.<sup>9 26</sup> NAA is mainly found in neuroaxonal tissue and the reduction in this metabolite seen in patient III2 corresponds to the neuronal loss found at autopsy of a patient with the rumpshaker mutation.<sup>17</sup> Axonal degeneration has been reported in the longest tracts of the *rsh*,<sup>23</sup> while human and mice with null-mutations in *PLP1/Plp1* show more prominent axonal degeneration.<sup>8</sup> MRS has previously been performed on non-rumpshaker mutation patients with PMD, SPG2 and female carriers, but the reports have been contradictory, especially with respect to the measures of NAA.<sup>8 22 26–30</sup> The controversy possibly reflects the fact that the patients carry different mutations which exert their effects in different ways despite involving the same gene. Axonal degeneration and neuronal loss may thus be present in varying degrees. In addition, the patients were analysed at different stages in their progressive disease. Differences in postprocessing of the different MRS data may further confuse interpretation of the results.

In conclusion, the phenotype of the patients from this second family with SPG2 caused by the rumpshaker mutation corresponds to the mildest phenotype reported. These data suggest the pathology to be an underlying mild, central, dysmyelinating disorder in combination with a central axonal degeneration

**Figure 3** MR spectroscopies. T2 weighted MRI and MRS occipito-parietal primarily white matter (WM), mid-occipital primarily grey matter (GM), centrum semiovale (CSO) in patients III2 and III4.

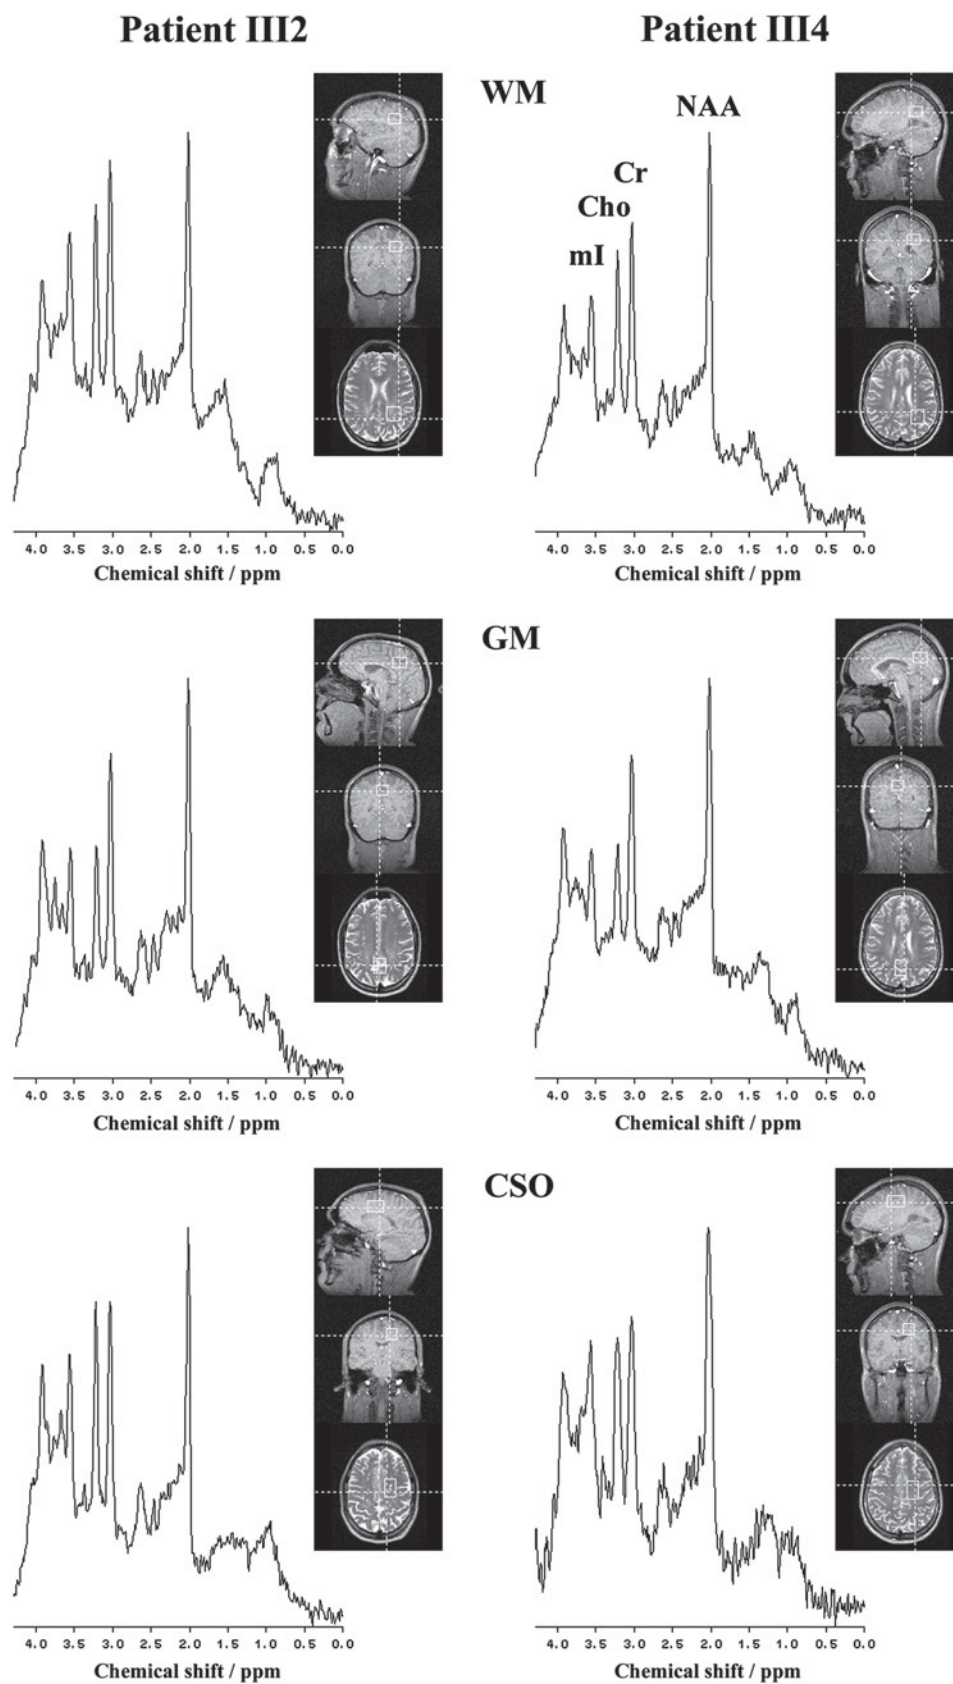

evolving as a consequence of disease duration as indicated in the oldest patient (III2) by MRS.

**Acknowledgements** The study was supported by Ludvig and Sara Elsass Foundation, Lægforeningens Research Foundation, the Novo Nordisk Foundation

and the Alzheimer's Research Foundation. The research conducted in this study complies with current Danish laws. The John and Birthe Meyer Foundation donated the MR scanner.

**Competing interests** None.

**Ethics approval** Ethics approval was provided by the Copenhagen Ethics committee.

## Research paper

**Patient consent** Obtained.

**Provenance and peer review** Not commissioned; externally peer reviewed.

## REFERENCES

1. **Harding AE.** Classification of the hereditary ataxias and paraplegias. *Lancet* 1983;**321**:1151–5.
2. **Macedo-Souza LI,** Kok F, Santos S, *et al.* Reevaluation of a large family defines a new locus for X-linked recessive pure spastic paraplegia (SPG34) on chromosome Xq25. *Neurogenetics* 2008;**9**:225–6.
3. **Steinmüller R,** Lantigua-Cruz A, Garcia-Garcia R, *et al.* Evidence of a third locus in X-linked recessive spastic paraplegia. *Hum Genet* 1997;**100**:287–9.
4. **Jouet M,** Rosenthal A, Armstrong G, *et al.* X-linked spastic paraplegia (SPG1), MASA syndrome and X-linked hydrocephalus result from mutations in the L1 gene. *Nat Genet* 1994;**7**:402–7.
5. **Saugier-Verber P,** Munnich A, Bonneau D, *et al.* X-linked spastic paraplegia and Pelizaeus–Merzbacher disease are allelic disorders at the proteolipid protein locus. *Nat Genet* 1994;**6**:257–62.
6. **Cailloux F,** Gauthier-Barichard F, Mimault C, *et al.* Genotype–phenotype correlation in inherited brain myelination defects due to proteolipid protein gene mutations. Clinical European Network on Brain Dysmyelinating Disease. *Eur J Hum Genet* 2000;**8**:837–45.
7. **Hurst S,** Garbern J, Trepanier A, *et al.* Quantifying the carrier female phenotype in Pelizaeus–Merzbacher disease. *Genet Med* 2006;**8**:371–8.
8. **Garbern JY,** Yool DA, Moore GJ, *et al.* Patients lacking the major CNS myelin protein, proteolipid protein 1, develop length-dependent axonal degeneration in the absence of demyelination and inflammation. *Brain* 2002;**125**:551–61.
9. **Inoue K.** PLP1-related inherited dysmyelinating disorders: Pelizaeus–Merzbacher disease and spastic paraplegia type 2. *Neurogenetics* 2005;**6**:1–16.
10. **Griffiths IR,** Scott I, McCulloch MC, *et al.* Rumpshaker mouse: a new X-linked mutation affecting myelination: evidence for a defect in PLP expression. *J Neurocytol* 1990;**19**:273–83.
11. **Schneider A,** Montague P, Griffiths I, *et al.* Uncoupling of hypomyelination and glial cell death by a mutation in the proteolipid protein gene. *Nature* 1992;**358**:758–61.
12. **Kobayashi H,** Hoffman EP, Marks HG. The rumpshaker mutation in spastic paraplegia. *Nat Genet* 1994;**7**:351–2.
13. **Johnston AW,** McKusick VA. A sex-linked recessive form of spastic paraplegia. *Am J Hum Genet* 1962;**14**:83–94.
14. **Provencher SW.** Estimation of metabolite concentrations from localized in vivo proton NMR spectra. *Magn Reson Med* 1993;**30**:672–9.
15. **Eberling TV,** Danielsen ER, Rasmussen AK, *et al.* Reduced myo-inositol and total choline measured with cerebral MRS in acute thyrotoxic Graves' disease. *Neurology* 2003;**60**:142–5.
16. **Minoshima S,** Frey KA, Koeppe RA, *et al.* A diagnostic approach in Alzheimer's disease using three-dimensional stereotactic surface projections of fluorine-18-FDG PET. *J Nucl Med* 1995;**36**:1238–48.
17. **Ginter DN,** Konigsmark BA, Abbott MH. X-linked spinocerebellar degeneration. *Birth Defects Orig Artic Ser* 1974;**X4**:334–6.
18. **Naidu S,** Dlouhy SR, Geraghty MT, *et al.* A male child with the rumpshaker mutation, X-linked spastic paraplegia/Pelizaeus–Merzbacher disease and lysinuria. *J Inher Metab Dis* 1997;**20**:811–16.
19. **Thurmon TF,** Walker BA, Scott CI, *et al.* Two kindreds with a sex-linked recessive form of spastic paraplegia. *Birth Defects Orig Artic Ser* 1971;**7**:219–21.
20. **Abel A,** Fonknechten N, Hofer A, *et al.* Early onset autosomal dominant spastic paraplegia caused by novel mutations in SPG3A. *Neurogenetics* 2004;**5**:239–43.
21. **McDermott CJ,** Burness CE, Kirby J, *et al.* Clinical features of hereditary spastic paraplegia due to spastin mutation. *Neurology* 2006;**67**:45–51.
22. **Pizzini F,** Fatemi AS, Barker PB, *et al.* Proton MR spectroscopic imaging in Pelizaeus–Merzbacher disease. *Am J Neuroradiol* 2003;**24**:1683–9.
23. **Edgar JM,** McLaughlin M, Barrie JA, *et al.* Age-related axonal and myelin changes in the rumpshaker mutation of the Plp gene. *Acta Neuropathol* 2004;**107**:331–5.
24. **Danielsen E,** Ross B. *Magnetic resonance spectroscopy: diagnosis of neurological diseases.* 1st edn. New York: Marcel Dekker, 1999.
25. **Oz G,** Tkac I, Charnas LR, *et al.* Assessment of adrenoleukodystrophy lesions by high field MRS in non-sedated pediatric patients. *Neurology* 2005;**64**:434–41.
26. **Hanefeld FA,** Brockmann K, Pouwels PJ, *et al.* Quantitative proton MRS of Pelizaeus–Merzbacher disease: evidence of dys- and hypomyelination. *Neurology* 2005;**65**:701–6.
27. **Bonavita S,** Schiffmann R, Moore DF, *et al.* Evidence for neuroaxonal injury in patients with proteolipid protein gene mutations. *Neurology* 2001;**56**:785–8.
28. **Nezu A,** Kimura S, Takeshita S, *et al.* An MRI and MRS study of Pelizaeus–Merzbacher disease. *Pediatr Neurol* 1998;**18**:334–7.
29. **Plecko B,** Stöckler-Ipsiroglu S, Gruber S, *et al.* Degree of hypomyelination and magnetic resonance spectroscopy findings in patients with Pelizaeus Merzbacher phenotype. *Neuropediatrics* 2003;**34**:127–36.
30. **Takanashi J,** Inoue K, Tomita M, *et al.* Brain N-acetylaspartate is elevated in Pelizaeus–Merzbacher disease with PLP1 duplication. *Neurology* 2002;**58**:237–41.

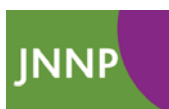

## Hereditary spastic paraplegia caused by the *PLP1* 'rumpshaker mutation'

Kirsten Svenstrup, Geneviève Giraud, Odile Boespflug-Tanguy, et al.

*J Neurol Neurosurg Psychiatry* 2010 81: 666-672 originally published online December 1, 2009

doi: 10.1136/jnp.2009.180315

---

Updated information and services can be found at:

<http://jnp.bmj.com/content/81/6/666.full.html>

---

*These include:*

### References

This article cites 29 articles, 9 of which can be accessed free at:

<http://jnp.bmj.com/content/81/6/666.full.html#ref-list-1>

### Email alerting service

Receive free email alerts when new articles cite this article. Sign up in the box at the top right corner of the online article.

---

### Topic Collections

Articles on similar topics can be found in the following collections

[Neuromuscular disease](#) (939 articles)

[Peripheral nerve disease](#) (480 articles)

[Multiple sclerosis](#) (610 articles)

---

### Notes

---

To request permissions go to:

<http://group.bmj.com/group/rights-licensing/permissions>

To order reprints go to:

<http://journals.bmj.com/cgi/reprintform>

To subscribe to BMJ go to:

<http://group.bmj.com/subscribe/>
